# Supplementary material for: Evaluation of the daytime tropospheric loss of 2-methylbutanal
Source: Copernicus journal article supplement (doi:10.5194/acp-22-2689-2022), 2022-03-01
Supplement: Supplementary file 1 [file acp-22-2689-2022-supplement.zip]

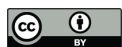

## *Supplement of*

# **Evaluation of the daytime tropospheric loss of 2-methylbutanal**

**María Asensio et al.**

*Correspondence to:* Elena Jiménez (elena.jimenez@uclm.es)

- [acp-22-2689-2022-supplement-title-page.pdf](#)
- [SI\\_Asensio et al. UV and IR absorption cross section table.xlsx](#)
- [SI\\_Asensio et al.pdf](#)

The copyright of individual parts of the supplement might differ from the article licence.
