# Supplementary material for: Evaluation of the daytime tropospheric loss of 2-methylbutanal
Source: Copernicus journal article supplement (doi:10.5194/acp-22-2689-2022), 2022-03-01
Supplement: Supplementary file 2 [file acp-22-2689-2022-supplement.zip]

Archive with 3 entries (3 files):
- SI_Asensio et al.pdf
- acp-22-2689-2022-supplement-title-page.pdf
- SI_Asensio et al. UV and IR absorption cross section table.xlsx
