# Supplementary material for: Evaluation of the daytime tropospheric loss of 2-methylbutanal
Source: Copernicus journal article supplement (doi:10.5194/acp-22-2689-2022), 2022-03-01
Supplement: Supplementary file 2 [file acp-22-2689-2022-supplement.zip › SI_Asensio et al. UV and IR absorption cross section table.xlsx]

## Sheet: UV Absorption cross section
UV Absorption cross sections of 2-methylbutanal
λ / nm	σλ (base e) / cm2 molecule-1	Uncertainty (±2σ) / cm2 molecule-1
220	1.14187e-21	1.05324e-21
221	1.0875e-21	1.01061e-21
222	1.02163e-21	9.87186e-22
223	1.01207e-21	1.13978e-21
224	9.82721e-22	1.01847e-21
225	9.38073e-22	8.2262e-22
226	9.73173e-22	9.01452e-22
227	9.69301e-22	7.76374e-22
228	9.43889e-22	6.19535e-22
229	9.56214e-22	6.11602e-22
230	1.01787e-21	6.66377e-22
231	1.08025e-21	6.00857e-22
232	1.21488e-21	6.77748e-22
233	1.30884e-21	6.38915e-22
234	1.38256e-21	5.3637e-22
235	1.53083e-21	5.10668e-22
236	1.63936e-21	5.18591e-22
237	1.78879e-21	4.84481e-22
238	2.02464e-21	4.02869e-22
239	2.23699e-21	4.89787e-22
240	2.52674e-21	5.13913e-22
241	2.8115e-21	4.67363e-22
242	3.11421e-21	4.86487e-22
243	3.39845e-21	4.7608e-22
244	3.81693e-21	4.08595e-22
245	4.27075e-21	4.4541e-22
246	4.65243e-21	6.15669e-22
247	5.13157e-21	6.80039e-22
248	5.67451e-21	7.22513e-22
249	6.31475e-21	7.28518e-22
250	7.00766e-21	7.34396e-22
251	7.66273e-21	8.22538e-22
252	8.4833e-21	7.41008e-22
253	9.2358e-21	8.4407e-22
254	1.00693e-20	8.75859e-22
255	1.10609e-20	7.39726e-22
256	1.20438e-20	7.50313e-22
257	1.30642e-20	8.54825e-22
258	1.42162e-20	8.26897e-22
259	1.54449e-20	8.41233e-22
260	1.66404e-20	8.68316e-22
261	1.79357e-20	8.51265e-22
262	1.93355e-20	8.37647e-22
263	2.08175e-20	7.43458e-22
264	2.22182e-20	7.05269e-22
265	2.36609e-20	7.63866e-22
266	2.52713e-20	7.23887e-22
267	2.68426e-20	6.64183e-22
268	2.84242e-20	7.48408e-22
269	3.00486e-20	8.03173e-22
270	3.17846e-20	9.37208e-22
271	3.34979e-20	8.79384e-22
272	3.52949e-20	5.54394e-22
273	3.69077e-20	7.20297e-22
274	3.85016e-20	7.07575e-22
275	4.01311e-20	8.81892e-22
276	4.1811e-20	7.84038e-22
277	4.36282e-20	7.5867e-22
278	4.54113e-20	6.95158e-22
279	4.70879e-20	6.70706e-22
280	4.8717e-20	7.31216e-22
281	5.00875e-20	8.17625e-22
282	5.13272e-20	7.68196e-22
283	5.26689e-20	6.55281e-22
284	5.3981e-20	7.66974e-22
285	5.53359e-20	8.04269e-22
286	5.65863e-20	8.98827e-22
287	5.77383e-20	9.77163e-22
288	5.88312e-20	7.80265e-22
289	5.96567e-20	1.00294e-21
290	6.03379e-20	8.73184e-22
291	6.08623e-20	7.03714e-22
292	6.12167e-20	8.07471e-22
293	6.16903e-20	7.1941e-22
294	6.21748e-20	9.22842e-22
295	6.25285e-20	7.17387e-22
296	6.25431e-20	7.52361e-22
297	6.23683e-20	6.92097e-22
298	6.19359e-20	7.54659e-22
299	6.15539e-20	4.83947e-22
300	6.10584e-20	7.02167e-22
301	6.04873e-20	7.05519e-22
302	5.99254e-20	8.62375e-22
303	5.92919e-20	9.46553e-22
304	5.85286e-20	7.71652e-22
305	5.74758e-20	8.42585e-22
306	5.6038e-20	8.92673e-22
307	5.41998e-20	6.92575e-22
308	5.23049e-20	8.0285e-22
309	5.06788e-20	8.98413e-22
310	4.92233e-20	7.98185e-22
311	4.77815e-20	8.19096e-22
312	4.62843e-20	6.63513e-22
313	4.47388e-20	6.80384e-22
314	4.32447e-20	5.78549e-22
315	4.16543e-20	6.96728e-22
316	3.97158e-20	8.13316e-22
317	3.72462e-20	7.52521e-22
318	3.44754e-20	7.07848e-22
319	3.18012e-20	7.66949e-22
320	2.97368e-20	7.97541e-22
321	2.78768e-20	5.92105e-22
322	2.60909e-20	7.63506e-22
323	2.44177e-20	8.90164e-22
324	2.28174e-20	8.59338e-22
325	2.13195e-20	9.35549e-22
326	1.97132e-20	1.03724e-21
327	1.82117e-20	9.39657e-22
328	1.65116e-20	8.52531e-22
329	1.46409e-20	6.41055e-22
330	1.27288e-20	6.33842e-22
331	1.08542e-20	5.8468e-22
332	9.36909e-21	6.36117e-22
333	8.15025e-21	6.48707e-22
334	7.19477e-21	5.22558e-22
335	6.31744e-21	5.14217e-22
336	5.44164e-21	6.56141e-22
337	4.70926e-21	6.91374e-22
338	4.05586e-21	7.86797e-22
339	3.45743e-21	7.63415e-22
340	3.0294e-21	6.68835e-22
341	2.5026e-21	5.16182e-22
342	1.99135e-21	4.54175e-22
343	1.54091e-21	6.38414e-22
344	1.12464e-21	5.75102e-22
345	7.91864e-22	5.00262e-22
346	6.18763e-22	5.62781e-22
347	5.2869e-22	5.23988e-22
348	4.82836e-22	4.3074e-22
349	4.02312e-22	3.15515e-22
350	3.77276e-22	4.07919e-22
351	3.74175e-22	5.27834e-22
352	4.43063e-22	8.92381e-22
353	3.25478e-22	6.38156e-22
354	3.26977e-22	6.84316e-22
355	3.41538e-22	8.64171e-22
356	3.69232e-22	8.88835e-22
357	2.77809e-22	7.79292e-22
358	2.77146e-22	8.16625e-22
359	2.85529e-22	7.36516e-22
360	3.25043e-22	8.14549e-22

## Sheet: IR absorption cross sections
IR Absorption cross sections of 2-methylbutanal
n (cm-1)	σn(base e) / cm2 molecule-1	Uncertainty (±2σ) / cm2 molecule-1
649.904	4.99253e-21	2.96824e-21
650.868	5.4523e-21	2.84462e-21
651.832	5.31584e-21	2.90763e-21
652.797	4.93353e-21	3.09546e-21
653.761	4.34931e-21	2.97402e-21
654.725	3.58078e-21	2.70085e-21
655.689	4.30194e-21	3.0874e-21
656.654	3.86077e-21	3.62468e-21
657.618	3.89025e-21	2.61135e-21
658.582	5.46285e-21	2.00368e-21
659.547	5.4374e-21	2.39501e-21
660.511	4.91064e-21	2.39956e-21
661.475	4.0875e-21	2.10005e-21
662.439	3.4494e-21	2.33964e-21
663.404	2.8602e-21	2.05693e-21
664.368	1.12871e-21	2.09522e-21
665.332	7.36326e-22	2.2368e-21
666.296	1.65587e-21	3.12424e-21
667.26	5.0607e-21	6.01733e-21
668.225	1.55209e-20	1.55625e-20
669.189	7.992e-21	9.2549e-21
670.153	3.3349e-21	4.09818e-21
671.117	2.60062e-21	1.97222e-21
672.082	2.34379e-21	2.05427e-21
673.046	2.08197e-21	3.06255e-21
674.01	1.32317e-21	3.25975e-21
674.975	8.34925e-22	3.06189e-21
675.939	1.4485e-22	2.87138e-21
676.903	4.53745e-22	2.58651e-21
677.867	4.68941e-22	2.66349e-21
678.832	1.06198e-21	3.33294e-21
679.796	3.99955e-23	3.77126e-21
680.76	5.86817e-24	3.27377e-21
681.724	1.13955e-21	2.29841e-21
682.688	1.51358e-21	2.49892e-21
683.653	6.79829e-22	2.92627e-21
684.617	1.1588e-23	2.67931e-21
685.581	1.5555e-22	2.30147e-21
686.545	2.1984e-22	1.93336e-21
687.51	7.54435e-22	1.67061e-21
688.474	1.90905e-22	2.00141e-21
689.438	1.74132e-22	2.60231e-21
690.403	1.06923e-21	2.41784e-21
691.367	1.14895e-21	2.17274e-21
692.331	2.54196e-22	2.07317e-21
693.295	8.75683e-22	1.56344e-21
694.26	1.04823e-21	1.8888e-21
695.224	8.0859e-22	1.90571e-21
696.188	4.09979e-22	1.72886e-21
697.152	6.51686e-22	1.82013e-21
698.116	1.00046e-21	1.94341e-21
699.081	9.92134e-22	1.94537e-21
700.045	1.08344e-21	1.63773e-21
701.009	1.48349e-21	1.40915e-21
701.973	1.8163e-21	1.43598e-21
702.938	1.11266e-21	1.19143e-21
703.902	1.12935e-21	1.19048e-21
704.866	1.5549e-21	1.43498e-21
705.83	1.22892e-21	1.42947e-21
706.795	5.15842e-22	1.15897e-21
707.759	3.94421e-22	1.25272e-21
708.723	6.09361e-22	1.16327e-21
709.687	9.35547e-22	9.84378e-22
710.652	1.10354e-21	1.03249e-21
711.616	9.28262e-22	1.15765e-21
712.58	9.95646e-22	1.08431e-21
713.544	7.71945e-22	1.12299e-21
714.509	9.90509e-22	1.31312e-21
715.473	1.66548e-21	1.05432e-21
716.437	1.83979e-21	9.8899e-22
717.401	1.82044e-21	1.16125e-21
718.366	1.53488e-21	1.08375e-21
719.33	8.49278e-22	1.33875e-21
720.294	2.32335e-22	1.68677e-21
721.258	7.77768e-22	1.34057e-21
722.223	8.58937e-22	1.15698e-21
723.187	6.4015e-22	1.10429e-21
724.151	8.82751e-22	1.19975e-21
725.115	1.84172e-21	1.36538e-21
726.08	2.32746e-21	1.4702e-21
727.044	1.83863e-21	1.48586e-21
728.008	1.30086e-21	1.14753e-21
728.972	1.18874e-21	9.15588e-22
729.937	1.62724e-21	9.32338e-22
730.901	1.50512e-21	1.20039e-21
731.865	1.52604e-21	1.32077e-21
732.829	1.46005e-21	1.33365e-21
733.794	5.49756e-22	1.08151e-21
734.758	5.13916e-22	7.97964e-22
735.722	1.53443e-21	9.6298e-22
736.686	1.64208e-21	1.25408e-21
737.651	9.48491e-22	1.42822e-21
738.615	6.89713e-22	1.3651e-21
739.579	5.53747e-22	1.1674e-21
740.543	1.10451e-22	1.12867e-21
741.508	7.16715e-22	1.18425e-21
742.472	9.7189e-22	1.30019e-21
743.436	8.5295e-22	1.41317e-21
744.4	1.22555e-21	1.21662e-21
745.365	1.42607e-21	1.10565e-21
746.329	1.04516e-21	1.12095e-21
747.293	1.54376e-21	1.16978e-21
748.257	2.80063e-21	1.23553e-21
749.222	3.36367e-21	1.28692e-21
750.186	4.03806e-21	1.26505e-21
751.15	4.4192e-21	1.42055e-21
752.114	4.90048e-21	1.28115e-21
753.079	5.79566e-21	1.3646e-21
754.043	7.05623e-21	1.25519e-21
755.007	7.91636e-21	1.07315e-21
755.971	8.46835e-21	1.05977e-21
756.936	9.3905e-21	1.17792e-21
757.9	1.07018e-20	1.26582e-21
758.864	1.2502e-20	1.31415e-21
759.828	1.38223e-20	1.22667e-21
760.793	1.45106e-20	1.17067e-21
761.757	1.56396e-20	1.26538e-21
762.721	1.63103e-20	1.38933e-21
763.685	1.71591e-20	1.37058e-21
764.65	1.85831e-20	1.27401e-21
765.614	2.04122e-20	1.37264e-21
766.578	2.17143e-20	1.28692e-21
767.542	2.23558e-20	1.17288e-21
768.507	2.28837e-20	1.25738e-21
769.471	2.3432e-20	1.43476e-21
770.435	2.40985e-20	1.66724e-21
771.399	2.45057e-20	1.4094e-21
772.364	2.44334e-20	1.23098e-21
773.328	2.43153e-20	1.14977e-21
774.292	2.42132e-20	1.06345e-21
775.256	2.4122e-20	1.23584e-21
776.221	2.43288e-20	1.24974e-21
777.185	2.41592e-20	1.12037e-21
778.149	2.38792e-20	1.20685e-21
779.113	2.30848e-20	1.30147e-21
780.078	2.25602e-20	1.25207e-21
781.042	2.23544e-20	1.17786e-21
782.006	2.11274e-20	1.13721e-21
782.97	2.0054e-20	1.24908e-21
783.935	1.92271e-20	1.1095e-21
784.899	1.83659e-20	1.17268e-21
785.863	1.70939e-20	1.23674e-21
786.827	1.56318e-20	1.5126e-21
787.792	1.39433e-20	1.51932e-21
788.756	1.28891e-20	1.49198e-21
789.72	1.18873e-20	1.4829e-21
790.684	1.06939e-20	1.20656e-21
791.649	1.00985e-20	1.22675e-21
792.613	9.85572e-21	1.2447e-21
793.577	9.24983e-21	1.08456e-21
794.541	8.19254e-21	7.98988e-22
795.506	7.55422e-21	1.15561e-21
796.47	7.36317e-21	1.29089e-21
797.434	6.34108e-21	1.32279e-21
798.398	5.7688e-21	1.12594e-21
799.363	5.48751e-21	1.30443e-21
800.327	4.9462e-21	1.68936e-21
801.291	4.51982e-21	1.38254e-21
802.255	3.98516e-21	1.19969e-21
803.22	3.25071e-21	1.33425e-21
804.184	3.29261e-21	1.33298e-21
805.148	3.4034e-21	1.32129e-21
806.112	2.54222e-21	1.11796e-21
807.077	1.61872e-21	1.02573e-21
808.041	1.80337e-21	1.07324e-21
809.005	1.37587e-21	9.33681e-22
809.969	4.22664e-22	8.45121e-22
810.934	2.4616e-22	9.41603e-22
811.898	3.12402e-22	9.38789e-22
812.862	1.30831e-21	1.09268e-21
813.826	9.843e-22	1.0566e-21
814.791	6.08559e-22	1.11207e-21
815.755	5.7375e-22	1.12449e-21
816.719	1.80738e-22	1.23509e-21
817.683	3.74953e-22	1.33101e-21
818.648	4.03429e-22	1.29823e-21
819.612	1.8286e-22	1.37054e-21
820.576	2.85915e-22	1.26246e-21
821.54	6.47988e-23	1.08383e-21
822.505	3.72452e-22	1.10745e-21
823.469	1.59646e-22	1.16981e-21
824.433	1.02339e-22	1.04197e-21
825.397	1.68367e-22	1.15025e-21
826.362	4.40197e-22	1.22891e-21
827.326	5.15048e-22	1.18652e-21
828.29	4.7458e-23	1.11427e-21
829.254	4.45815e-23	1.37606e-21
830.219	5.92008e-22	1.35452e-21
831.183	9.81837e-22	1.07771e-21
832.147	8.29474e-22	1.00952e-21
833.111	4.45316e-22	1.2021e-21
834.076	4.8595e-22	1.23887e-21
835.04	9.46943e-22	1.30649e-21
836.004	1.33011e-21	1.15707e-21
836.968	1.7458e-21	1.02254e-21
837.933	1.85514e-21	1.02077e-21
838.897	1.59349e-21	8.99153e-22
839.861	1.08719e-21	1.07192e-21
840.825	8.48946e-22	1.23012e-21
841.79	9.30014e-22	1.18929e-21
842.754	9.61367e-22	1.10694e-21
843.718	8.40319e-22	1.00867e-21
844.682	5.64008e-22	1.06233e-21
845.647	4.4367e-22	1.09203e-21
846.611	5.96872e-22	1.16586e-21
847.575	6.17407e-22	1.19703e-21
848.539	6.61264e-22	1.28402e-21
849.504	3.86727e-22	1.24851e-21
850.468	2.43626e-23	1.03999e-21
851.432	1.44653e-22	9.47837e-22
852.396	4.56147e-23	1.10457e-21
853.361	3.10706e-22	1.14882e-21
854.325	3.25447e-22	9.69102e-22
855.289	3.493e-22	1.07217e-21
856.253	3.64465e-22	1.09886e-21
857.218	1.75544e-22	1.01295e-21
858.182	1.07561e-22	9.88099e-22
859.146	1.47274e-22	9.98933e-22
860.11	1.4651e-23	1.09537e-21
861.075	1.91314e-22	1.12797e-21
862.039	5.14882e-22	1.24327e-21
863.003	4.31445e-22	1.19475e-21
863.967	5.8567e-22	1.00741e-21
864.932	1.01353e-21	9.84845e-22
865.896	1.70777e-21	1.06038e-21
866.86	1.96965e-21	1.13048e-21
867.824	2.09504e-21	1.24644e-21
868.789	2.35024e-21	1.17823e-21
869.753	2.44851e-21	1.13677e-21
870.717	2.4799e-21	1.23202e-21
871.681	2.96843e-21	1.26057e-21
872.646	3.55765e-21	1.1276e-21
873.61	4.14204e-21	1.13061e-21
874.574	4.63472e-21	1.13694e-21
875.538	4.91484e-21	1.08507e-21
876.503	5.17995e-21	1.09755e-21
877.467	5.89179e-21	1.05491e-21
878.431	6.96108e-21	9.46332e-22
879.395	7.46936e-21	9.78132e-22
880.36	8.19193e-21	1.09321e-21
881.324	8.97223e-21	1.11071e-21
882.288	1.01561e-20	1.00713e-21
883.252	1.16504e-20	1.23797e-21
884.217	1.30139e-20	1.14639e-21
885.181	1.44207e-20	1.10118e-21
886.145	1.55043e-20	1.26432e-21
887.109	1.70235e-20	1.36569e-21
888.073	1.91279e-20	1.21599e-21
889.038	2.09348e-20	1.12116e-21
890.002	2.2181e-20	1.16161e-21
890.966	2.34367e-20	1.20678e-21
891.931	2.48393e-20	1.22741e-21
892.895	2.61158e-20	1.22677e-21
893.859	2.70447e-20	1.24031e-21
894.823	2.78878e-20	1.27609e-21
895.788	2.93423e-20	1.47442e-21
896.752	3.12459e-20	1.53059e-21
897.716	3.22084e-20	1.30831e-21
898.68	3.21896e-20	1.2612e-21
899.644	3.34259e-20	1.35213e-21
900.609	3.50707e-20	1.34897e-21
901.573	3.56426e-20	1.42495e-21
902.537	3.60574e-20	1.41204e-21
903.501	3.62541e-20	1.30904e-21
904.466	3.6928e-20	1.38863e-21
905.43	3.71921e-20	1.54756e-21
906.394	3.70373e-20	1.48577e-21
907.359	3.69912e-20	1.37603e-21
908.323	3.66996e-20	1.12917e-21
909.287	3.65547e-20	1.15438e-21
910.251	3.59885e-20	1.2872e-21
911.216	3.44617e-20	1.27223e-21
912.18	3.31104e-20	1.42847e-21
913.144	3.18563e-20	1.5307e-21
914.108	3.0227e-20	1.44455e-21
915.072	2.87664e-20	1.14013e-21
916.037	2.7376e-20	1.13983e-21
917.001	2.61259e-20	1.35973e-21
917.965	2.62014e-20	1.35457e-21
918.93	2.69263e-20	1.25148e-21
919.894	2.53843e-20	1.14452e-21
920.858	2.23287e-20	1.18825e-21
921.822	2.10635e-20	1.32591e-21
922.787	2.03291e-20	1.20799e-21
923.751	1.93179e-20	1.1439e-21
924.715	1.87885e-20	1.23155e-21
925.679	1.83298e-20	1.19033e-21
926.644	1.69884e-20	1.01859e-21
927.608	1.57783e-20	1.01005e-21
928.572	1.43263e-20	1.11225e-21
929.536	1.24971e-20	1.08159e-21
930.5	1.09573e-20	1.09155e-21
931.465	9.43763e-21	1.06729e-21
932.429	7.76566e-21	1.06588e-21
933.393	6.66813e-21	1.07539e-21
934.357	5.95991e-21	9.83758e-22
935.322	5.06741e-21	1.02773e-21
936.286	3.92208e-21	1.12869e-21
937.25	3.71524e-21	1.11486e-21
938.215	3.42218e-21	9.85646e-22
939.179	2.92047e-21	1.02003e-21
940.143	2.43294e-21	9.93675e-22
941.107	2.11995e-21	1.00616e-21
942.072	2.09116e-21	1.14635e-21
943.036	2.19367e-21	1.0151e-21
944	1.97275e-21	9.56807e-22
944.964	1.84838e-21	9.48609e-22
945.928	2.09929e-21	1.10119e-21
946.893	2.23242e-21	1.07573e-21
947.857	2.56522e-21	1.01951e-21
948.821	2.7464e-21	1.15477e-21
949.785	2.50769e-21	1.12216e-21
950.75	2.18287e-21	1.19892e-21
951.714	2.706e-21	1.22924e-21
952.678	3.23433e-21	1.04735e-21
953.643	3.58739e-21	9.94392e-22
954.607	4.34699e-21	1.11957e-21
955.571	4.76318e-21	1.12625e-21
956.535	5.43112e-21	1.08224e-21
957.5	5.91783e-21	1.21384e-21
958.464	6.6519e-21	1.20812e-21
959.428	7.68934e-21	1.14553e-21
960.392	8.20998e-21	1.02654e-21
961.356	9.12005e-21	1.06701e-21
962.321	9.88085e-21	1.14861e-21
963.285	1.03809e-20	9.80781e-22
964.249	1.13093e-20	8.74728e-22
965.213	1.20758e-20	1.03851e-21
966.178	1.24188e-20	1.11195e-21
967.142	1.26492e-20	1.25515e-21
968.106	1.2614e-20	1.41286e-21
969.071	1.26892e-20	1.33968e-21
970.035	1.27762e-20	1.24188e-21
970.999	1.26828e-20	1.02085e-21
971.963	1.30174e-20	9.47137e-22
972.928	1.32822e-20	1.15659e-21
973.892	1.31666e-20	1.23995e-21
974.856	1.2803e-20	1.159e-21
975.82	1.22968e-20	1.11357e-21
976.784	1.14996e-20	1.02946e-21
977.749	1.08596e-20	1.03437e-21
978.713	1.06963e-20	1.05295e-21
979.677	1.07392e-20	1.1839e-21
980.641	1.05222e-20	1.23763e-21
981.606	9.83866e-21	1.22352e-21
982.57	9.61565e-21	1.1791e-21
983.534	9.13228e-21	1.08514e-21
984.499	8.10002e-21	1.07651e-21
985.463	7.6359e-21	1.10541e-21
986.427	7.58077e-21	1.07518e-21
987.391	7.65355e-21	1.04457e-21
988.356	7.5795e-21	1.01309e-21
989.32	7.26837e-21	1.125e-21
990.284	7.26185e-21	1.25116e-21
991.248	7.61259e-21	1.186e-21
992.212	7.6392e-21	1.09697e-21
993.177	7.81501e-21	1.07663e-21
994.141	8.08565e-21	1.07925e-21
995.105	8.30864e-21	1.07525e-21
996.069	8.85371e-21	1.03374e-21
997.034	9.16403e-21	1.17432e-21
997.998	8.98964e-21	1.24798e-21
998.962	9.31238e-21	1.13878e-21
999.927	9.41095e-21	1.12257e-21
1000.89	9.67724e-21	1.11598e-21
1001.86	1.00282e-20	1.07659e-21
1002.82	1.01279e-20	1.10309e-21
1003.78	1.05173e-20	1.07722e-21
1004.75	1.08856e-20	1.02731e-21
1005.71	1.0858e-20	1.05893e-21
1006.68	1.0514e-20	1.05669e-21
1007.64	1.04031e-20	1.22999e-21
1008.61	1.06066e-20	1.26191e-21
1009.57	1.09802e-20	1.24829e-21
1010.53	1.10196e-20	1.26135e-21
1011.5	1.06727e-20	1.25513e-21
1012.46	9.92996e-21	1.20914e-21
1013.43	9.60578e-21	1.23203e-21
1014.39	9.48988e-21	1.2056e-21
1015.35	9.09536e-21	1.20855e-21
1016.32	8.66955e-21	1.23358e-21
1017.28	8.44402e-21	1.26727e-21
1018.25	8.31067e-21	1.06046e-21
1019.21	7.92959e-21	9.99167e-22
1020.18	7.6294e-21	1.12445e-21
1021.14	6.82998e-21	1.10319e-21
1022.1	6.36594e-21	1.08023e-21
1023.07	6.31199e-21	1.14891e-21
1024.03	6.03092e-21	1.19413e-21
1025	5.65041e-21	1.13652e-21
1025.96	5.59114e-21	1.05504e-21
1026.92	5.24615e-21	1.10093e-21
1027.89	4.81879e-21	1.07751e-21
1028.85	4.65146e-21	9.22077e-22
1029.82	4.48465e-21	1.03979e-21
1030.78	3.58598e-21	1.15038e-21
1031.75	3.10511e-21	1.15574e-21
1032.71	3.2121e-21	9.43951e-22
1033.67	3.3364e-21	9.21095e-22
1034.64	2.91381e-21	1.04604e-21
1035.6	2.26192e-21	1.12754e-21
1036.57	1.39686e-21	1.16885e-21
1037.53	1.11443e-21	1.1439e-21
1038.5	8.75872e-22	1.08253e-21
1039.46	7.97991e-22	8.98435e-22
1040.42	1.11451e-21	9.62312e-22
1041.39	1.06323e-21	1.04669e-21
1042.35	7.49422e-22	1.06464e-21
1043.32	2.37228e-22	1.06409e-21
1044.28	1.19288e-22	1.08836e-21
1045.25	9.15037e-23	9.54908e-22
1046.21	7.97865e-24	9.99807e-22
1047.17	2.66501e-22	1.09821e-21
1048.14	3.22206e-22	1.05992e-21
1049.1	3.05281e-22	1.09286e-21
1050.07	1.7535e-22	9.16643e-22
1051.03	3.46057e-22	9.43165e-22
1052	6.35956e-22	1.15987e-21
1052.96	6.85876e-22	1.14295e-21
1053.92	6.77288e-22	1.0671e-21
1054.89	3.56755e-22	9.51769e-22
1055.85	1.25472e-22	8.95109e-22
1056.82	5.75999e-22	8.98049e-22
1057.78	8.17065e-22	9.22578e-22
1058.75	7.58794e-22	9.21486e-22
1059.71	9.52709e-22	9.13798e-22
1060.67	1.06331e-21	9.46898e-22
1061.64	8.80998e-22	9.43715e-22
1062.6	8.26579e-22	9.03146e-22
1063.57	8.77442e-22	9.31858e-22
1064.53	9.37868e-22	1.00502e-21
1065.49	8.01918e-22	1.02915e-21
1066.46	5.97801e-22	9.96499e-22
1067.42	8.26374e-22	1.01187e-21
1068.39	1.09996e-21	9.9992e-22
1069.35	8.95873e-22	9.46884e-22
1070.32	7.74701e-22	9.55831e-22
1071.28	9.61453e-22	9.64139e-22
1072.24	9.9259e-22	1.04477e-21
1073.21	7.02173e-22	1.02423e-21
1074.17	3.84399e-22	9.37899e-22
1075.14	3.34206e-22	9.70201e-22
1076.1	1.62556e-22	1.08956e-21
1077.07	5.94225e-23	1.07409e-21
1078.03	2.16691e-22	1.05252e-21
1078.99	2.05169e-22	1.10515e-21
1079.96	2.38045e-22	1.10215e-21
1080.92	2.33664e-22	9.61191e-22
1081.89	2.33956e-22	8.73556e-22
1082.85	3.08424e-22	9.55697e-22
1083.82	2.22235e-22	1.0229e-21
1084.78	1.31276e-23	1.03793e-21
1085.74	1.08487e-22	1.04313e-21
1086.71	3.48446e-22	1.11483e-21
1087.67	1.1274e-21	1.01887e-21
1088.64	1.42426e-21	8.8793e-22
1089.6	1.2664e-21	1.02161e-21
1090.57	1.47621e-21	9.88583e-22
1091.53	1.54225e-21	1.03573e-21
1092.49	1.39642e-21	1.15206e-21
1093.46	1.91624e-21	1.09215e-21
1094.42	2.54925e-21	1.13466e-21
1095.39	2.79375e-21	1.12247e-21
1096.35	3.13697e-21	1.06731e-21
1097.32	3.46237e-21	1.07147e-21
1098.28	3.46984e-21	1.06632e-21
1099.24	3.57399e-21	9.57626e-22
1100.21	3.71416e-21	1.021e-21
1101.17	3.81859e-21	1.15327e-21
1102.14	3.71115e-21	1.13666e-21
1103.1	3.86546e-21	1.13339e-21
1104.07	4.17443e-21	1.03441e-21
1105.03	4.37071e-21	1.0924e-21
1105.99	4.34252e-21	1.0981e-21
1106.96	4.28779e-21	9.32962e-22
1107.92	4.5335e-21	8.43656e-22
1108.89	4.65074e-21	9.45093e-22
1109.85	4.31151e-21	9.10138e-22
1110.82	4.35457e-21	9.28613e-22
1111.78	4.60536e-21	9.45008e-22
1112.74	4.51676e-21	9.64741e-22
1113.71	4.2181e-21	9.93387e-22
1114.67	4.16597e-21	1.0438e-21
1115.64	4.37595e-21	1.08626e-21
1116.6	4.64666e-21	1.10745e-21
1117.57	4.42423e-21	1.16681e-21
1118.53	4.23286e-21	1.15636e-21
1119.49	4.01681e-21	9.18105e-22
1120.46	3.94363e-21	8.79054e-22
1121.42	4.00631e-21	9.99433e-22
1122.39	3.64187e-21	1.12139e-21
1123.35	3.22963e-21	1.09292e-21
1124.32	3.35156e-21	1.02725e-21
1125.28	3.87581e-21	1.02124e-21
1126.24	3.92138e-21	9.93855e-22
1127.21	3.58149e-21	1.01968e-21
1128.17	3.67673e-21	1.06025e-21
1129.14	3.6521e-21	9.89497e-22
1130.1	3.88351e-21	1.06563e-21
1131.06	4.55125e-21	1.1233e-21
1132.03	4.7391e-21	1.07543e-21
1132.99	4.87598e-21	1.1533e-21
1133.96	5.20861e-21	1.23396e-21
1134.92	5.45588e-21	1.20078e-21
1135.89	5.76193e-21	1.03655e-21
1136.85	5.95689e-21	1.04213e-21
1137.81	5.81863e-21	1.09164e-21
1138.78	6.13842e-21	1.04052e-21
1139.74	6.84375e-21	9.6101e-22
1140.71	7.02183e-21	1.0567e-21
1141.67	7.01245e-21	1.07188e-21
1142.63	7.43657e-21	1.09078e-21
1143.6	8.16976e-21	1.03202e-21
1144.56	8.53839e-21	1.04143e-21
1145.53	8.73482e-21	1.07277e-21
1146.49	9.15421e-21	1.10482e-21
1147.46	9.72444e-21	1.18737e-21
1148.42	1.03387e-20	1.19325e-21
1149.38	1.08607e-20	1.06298e-21
1150.35	1.10478e-20	1.05874e-21
1151.31	1.13356e-20	1.17785e-21
1152.28	1.1729e-20	1.28495e-21
1153.24	1.17712e-20	1.2484e-21
1154.21	1.19988e-20	1.19161e-21
1155.17	1.23824e-20	1.18251e-21
1156.13	1.24044e-20	1.19449e-21
1157.1	1.23541e-20	1.17081e-21
1158.06	1.2223e-20	1.13276e-21
1159.03	1.21662e-20	1.09941e-21
1159.99	1.21078e-20	1.13648e-21
1160.96	1.21136e-20	1.27526e-21
1161.92	1.19247e-20	1.25945e-21
1162.88	1.15497e-20	1.15071e-21
1163.85	1.0775e-20	1.09334e-21
1164.81	1.03432e-20	1.16084e-21
1165.78	1.00883e-20	1.20201e-21
1166.74	9.74345e-21	1.07465e-21
1167.71	9.33903e-21	1.01287e-21
1168.67	9.16041e-21	1.07424e-21
1169.63	8.6774e-21	1.10224e-21
1170.6	8.0459e-21	1.14868e-21
1171.56	7.75933e-21	1.11375e-21
1172.53	7.67635e-21	1.06031e-21
1173.49	7.38309e-21	1.09518e-21
1174.46	7.26218e-21	1.15846e-21
1175.42	7.16865e-21	1.13647e-21
1176.38	6.76846e-21	1.1353e-21
1177.35	6.38688e-21	1.12113e-21
1178.31	6.4045e-21	1.07432e-21
1179.28	6.23882e-21	1.07141e-21
1180.24	6.05712e-21	1.09003e-21
1181.2	5.82144e-21	1.06523e-21
1182.17	5.28732e-21	1.04748e-21
1183.13	5.03473e-21	1.04405e-21
1184.1	4.8745e-21	1.06529e-21
1185.06	4.60508e-21	1.04378e-21
1186.03	4.57134e-21	1.04246e-21
1186.99	4.37415e-21	1.04332e-21
1187.95	3.89065e-21	1.09795e-21
1188.92	3.3405e-21	1.1528e-21
1189.88	2.86194e-21	1.12946e-21
1190.85	2.46275e-21	1.09781e-21
1191.81	2.50151e-21	1.05283e-21
1192.78	2.46947e-21	1.05049e-21
1193.74	2.20027e-21	1.09294e-21
1194.7	2.05849e-21	1.13854e-21
1195.67	1.76143e-21	1.11133e-21
1196.63	1.25764e-21	1.05291e-21
1197.6	9.54372e-22	9.99244e-22
1198.56	5.82554e-22	1.07816e-21
1199.53	2.36492e-22	1.14124e-21
1200.49	2.65451e-23	1.2057e-21
1201.45	3.60702e-23	1.17212e-21
1202.42	1.16092e-23	1.03145e-21
1203.38	2.50449e-23	1.08466e-21
1204.35	2.02115e-23	1.10965e-21
1205.31	1.71812e-22	1.09944e-21
1206.28	2.82057e-22	1.07796e-21
1207.24	3.44406e-22	1.06334e-21
1208.2	4.9111e-22	1.11043e-21
1209.17	3.36186e-22	1.08368e-21
1210.13	6.38432e-23	1.07895e-21
1211.1	2.36751e-22	1.03176e-21
1212.06	5.58438e-22	1.00774e-21
1213.03	6.49124e-22	1.09597e-21
1213.99	6.56481e-22	1.18164e-21
1214.95	4.99336e-22	1.11889e-21
1215.92	3.91976e-22	1.05496e-21
1216.88	4.28196e-22	1.10183e-21
1217.85	6.18087e-22	1.13908e-21
1218.81	6.74947e-22	1.17156e-21
1219.78	5.50176e-22	1.13092e-21
1220.74	6.11544e-22	1.08404e-21
1221.7	8.14873e-22	1.10874e-21
1222.67	8.98983e-22	1.13749e-21
1223.63	6.86271e-22	1.11786e-21
1224.6	6.95489e-22	1.09833e-21
1225.56	1.02986e-21	1.07292e-21
1226.53	8.61157e-22	1.06243e-21
1227.49	6.02914e-22	1.02697e-21
1228.45	6.74964e-22	1.03835e-21
1229.42	4.54758e-22	1.08042e-21
1230.38	2.31115e-22	1.08349e-21
1231.35	2.55651e-22	1.08146e-21
1232.31	2.27522e-22	1.1074e-21
1233.28	3.48632e-22	1.1127e-21
1234.24	4.57298e-22	1.13748e-21
1235.2	3.43793e-22	1.06623e-21
1236.17	1.55807e-22	1.01427e-21
1237.13	1.19544e-23	9.8841e-22
1238.1	2.41342e-22	9.89225e-22
1239.06	3.64284e-22	1.01369e-21
1240.03	4.56401e-22	1.04083e-21
1240.99	5.89036e-22	1.06466e-21
1241.95	7.43846e-22	1.10265e-21
1242.92	8.55828e-22	1.10725e-21
1243.88	1.10523e-21	1.10252e-21
1244.85	1.07196e-21	1.06157e-21
1245.81	1.0239e-21	1.12651e-21
1246.77	1.13813e-21	1.17888e-21
1247.74	1.25654e-21	1.14427e-21
1248.7	1.30775e-21	1.16758e-21
1249.67	1.51296e-21	1.08361e-21
1250.63	1.7152e-21	1.01065e-21
1251.6	1.67153e-21	1.08542e-21
1252.56	1.61942e-21	1.091e-21
1253.52	1.80395e-21	1.06208e-21
1254.49	1.77393e-21	1.09828e-21
1255.45	1.73399e-21	1.06902e-21
1256.42	1.80606e-21	1.03977e-21
1257.38	1.96789e-21	1.04696e-21
1258.35	1.9773e-21	1.08817e-21
1259.31	2.17228e-21	1.06148e-21
1260.27	2.37222e-21	1.03046e-21
1261.24	2.29043e-21	9.67921e-22
1262.2	2.36943e-21	9.61276e-22
1263.17	2.34158e-21	1.07722e-21
1264.13	2.33281e-21	1.18313e-21
1265.1	2.45883e-21	1.12224e-21
1266.06	2.19108e-21	1.12211e-21
1267.02	2.13864e-21	1.09361e-21
1267.99	2.50315e-21	1.06676e-21
1268.95	2.66464e-21	1.08872e-21
1269.92	2.58899e-21	1.10209e-21
1270.88	2.51295e-21	1.09415e-21
1271.85	2.75405e-21	1.10109e-21
1272.81	2.78871e-21	1.0453e-21
1273.77	2.63269e-21	1.05798e-21
1274.74	2.60099e-21	1.08633e-21
1275.7	2.71909e-21	1.15249e-21
1276.67	2.71191e-21	1.14679e-21
1277.63	2.68611e-21	1.07057e-21
1278.59	2.69153e-21	9.94567e-22
1279.56	2.4228e-21	1.051e-21
1280.52	2.21402e-21	1.07282e-21
1281.49	2.39029e-21	1.01908e-21
1282.45	2.4525e-21	9.97607e-22
1283.42	2.13418e-21	1.0891e-21
1284.38	2.12138e-21	1.13314e-21
1285.34	2.30883e-21	1.0825e-21
1286.31	2.54842e-21	1.06279e-21
1287.27	2.67329e-21	1.17624e-21
1288.24	2.46307e-21	1.24199e-21
1289.2	2.08587e-21	1.05344e-21
1290.17	1.84091e-21	1.01498e-21
1291.13	1.55706e-21	1.05155e-21
1292.09	1.64027e-21	1.04621e-21
1293.06	1.55937e-21	1.07548e-21
1294.02	1.19761e-21	1.10402e-21
1294.99	1.03479e-21	1.05291e-21
1295.95	1.12053e-21	1.0552e-21
1296.91	1.01645e-21	1.10704e-21
1297.88	8.42218e-22	1.09054e-21
1298.84	8.01769e-22	1.07006e-21
1299.81	6.07623e-22	1.05751e-21
1300.77	5.66997e-22	1.09896e-21
1301.74	5.44779e-22	1.10989e-21
1302.7	2.4541e-22	1.10271e-21
1303.66	2.90547e-22	1.05116e-21
1304.63	4.06951e-22	9.80971e-22
1305.59	3.38867e-22	9.31623e-22
1306.56	1.87684e-22	9.35791e-22
1307.52	3.08669e-22	9.7706e-22
1308.49	4.03978e-22	1.03103e-21
1309.45	3.13658e-22	1.02266e-21
1310.41	2.86668e-22	1.08283e-21
1311.38	6.2638e-22	1.13515e-21
1312.34	1.20268e-21	1.40417e-21
1313.31	1.33787e-21	1.31965e-21
1314.27	1.25151e-21	1.19051e-21
1315.24	1.24868e-21	1.0776e-21
1316.2	1.46538e-21	1.09902e-21
1317.16	1.63654e-21	1.24647e-21
1318.13	1.65854e-21	1.38554e-21
1319.09	1.72328e-21	1.54073e-21
1320.06	1.5443e-21	1.1706e-21
1321.02	1.55499e-21	1.03356e-21
1321.99	1.60809e-21	1.03757e-21
1322.95	1.57329e-21	1.14406e-21
1323.91	1.48654e-21	1.2388e-21
1324.88	1.73614e-21	1.13806e-21
1325.84	2.09672e-21	1.12786e-21
1326.81	2.22939e-21	1.10456e-21
1327.77	2.28642e-21	1.05426e-21
1328.73	2.54491e-21	1.0211e-21
1329.7	2.71567e-21	9.75627e-22
1330.66	2.94886e-21	9.6368e-22
1331.63	3.20748e-21	9.76242e-22
1332.59	3.25792e-21	1.07548e-21
1333.56	3.46868e-21	1.12959e-21
1334.52	3.74413e-21	1.03164e-21
1335.48	4.12251e-21	1.00886e-21
1336.45	4.94022e-21	1.30533e-21
1337.41	5.44717e-21	1.52274e-21
1338.38	6.4768e-21	2.35109e-21
1339.34	7.6568e-21	3.46283e-21
1340.31	7.4443e-21	2.82179e-21
1341.27	6.30042e-21	1.28254e-21
1342.23	6.03623e-21	1.09845e-21
1343.2	6.15037e-21	1.1096e-21
1344.16	6.17242e-21	1.08588e-21
1345.13	6.1835e-21	1.11528e-21
1346.09	6.49203e-21	1.16633e-21
1347.06	6.60236e-21	1.1297e-21
1348.02	6.74712e-21	1.08902e-21
1348.98	6.69877e-21	1.16429e-21
1349.95	6.42057e-21	1.17328e-21
1350.91	6.38881e-21	1.12612e-21
1351.88	6.49299e-21	1.08732e-21
1352.84	6.37618e-21	1.0748e-21
1353.81	6.47841e-21	1.17585e-21
1354.77	6.52441e-21	1.40372e-21
1355.73	6.12612e-21	1.15836e-21
1356.7	6.06189e-21	1.12205e-21
1357.66	6.25741e-21	1.20676e-21
1358.63	6.1881e-21	1.19531e-21
1359.59	6.27982e-21	1.19151e-21
1360.56	6.98813e-21	1.60028e-21
1361.52	7.85982e-21	2.26398e-21
1362.48	9.14153e-21	3.12766e-21
1363.45	9.29971e-21	2.47062e-21
1364.41	8.47642e-21	1.37579e-21
1365.38	8.98849e-21	1.13087e-21
1366.34	9.97235e-21	1.1141e-21
1367.31	1.08922e-20	1.28804e-21
1368.27	1.20653e-20	1.89771e-21
1369.23	1.28147e-20	1.6875e-21
1370.2	1.29872e-20	1.184e-21
1371.16	1.35968e-20	1.2015e-21
1372.13	1.4365e-20	1.35644e-21
1373.09	1.59638e-20	2.2196e-21
1374.06	1.80552e-20	3.30627e-21
1375.02	1.96291e-20	2.88093e-21
1375.98	2.0145e-20	1.57454e-21
1376.95	2.04806e-20	1.33439e-21
1377.91	2.11358e-20	1.67946e-21
1378.88	2.17565e-20	1.7234e-21
1379.84	2.2469e-20	1.4696e-21
1380.81	2.36621e-20	1.19913e-21
1381.77	2.48217e-20	1.16869e-21
1382.73	2.60358e-20	1.20264e-21
1383.7	2.73446e-20	1.23964e-21
1384.66	2.90073e-20	1.25276e-21
1385.63	3.03973e-20	1.53354e-21
1386.59	3.14753e-20	2.71206e-21
1387.56	3.11087e-20	2.8616e-21
1388.52	2.95451e-20	1.8162e-21
1389.48	2.90704e-20	1.43941e-21
1390.45	2.97227e-20	1.45501e-21
1391.41	2.98455e-20	1.49302e-21
1392.38	2.90668e-20	1.58217e-21
1393.34	2.94262e-20	2.19032e-21
1394.3	3.05454e-20	3.56017e-21
1395.27	2.87866e-20	3.26356e-21
1396.23	2.64519e-20	2.31142e-21
1397.2	2.54765e-20	2.35383e-21
1398.16	2.54535e-20	3.00433e-21
1399.13	2.43133e-20	3.00499e-21
1400.09	2.21081e-20	1.97553e-21
1401.05	2.07168e-20	1.27137e-21
1402.02	1.97999e-20	1.11427e-21
1402.98	1.87506e-20	1.25669e-21
1403.95	1.81572e-20	1.94921e-21
1404.91	1.70722e-20	2.57355e-21
1405.88	1.47551e-20	1.54906e-21
1406.84	1.30148e-20	1.1468e-21
1407.8	1.19306e-20	1.07921e-21
1408.77	1.08773e-20	1.06944e-21
1409.73	9.56864e-21	1.25961e-21
1410.7	8.54223e-21	1.43049e-21
1411.66	7.93815e-21	1.61347e-21
1412.62	6.77852e-21	1.31126e-21
1413.59	5.81496e-21	1.14359e-21
1414.55	5.30999e-21	1.0969e-21
1415.52	5.23082e-21	1.51012e-21
1416.48	5.55308e-21	2.20609e-21
1417.45	5.78389e-21	2.84365e-21
1418.41	6.24364e-21	3.72588e-21
1419.38	6.02775e-21	4.64838e-21
1420.34	3.87896e-21	2.10546e-21
1421.3	3.13216e-21	1.20672e-21
1422.27	3.17008e-21	1.31944e-21
1423.23	4.12296e-21	2.641e-21
1424.2	4.12766e-21	2.67592e-21
1425.16	2.98881e-21	1.29925e-21
1426.12	2.58254e-21	1.11266e-21
1427.09	2.74032e-21	1.14367e-21
1428.05	3.35013e-21	1.40761e-21
1429.02	4.3091e-21	1.89127e-21
1429.98	5.45327e-21	2.31256e-21
1430.95	4.91251e-21	1.55669e-21
1431.91	4.70957e-21	1.34037e-21
1432.87	5.22215e-21	1.5335e-21
1433.84	5.64574e-21	1.40594e-21
1434.8	6.35169e-21	1.74398e-21
1435.77	8.30638e-21	3.49449e-21
1436.73	1.05879e-20	3.91324e-21
1437.7	9.46057e-21	2.07855e-21
1438.66	9.41005e-21	1.45389e-21
1439.62	1.04341e-20	1.3176e-21
1440.59	1.17245e-20	1.17222e-21
1441.55	1.29727e-20	1.10622e-21
1442.52	1.42493e-20	1.13971e-21
1443.48	1.58359e-20	1.14102e-21
1444.44	1.75231e-20	1.15315e-21
1445.41	1.96612e-20	1.21969e-21
1446.37	2.22758e-20	1.63563e-21
1447.34	2.5673e-20	2.96354e-21
1448.3	2.89245e-20	2.65863e-21
1449.27	3.0293e-20	1.48821e-21
1450.23	3.24244e-20	1.37828e-21
1451.19	3.55656e-20	1.79327e-21
1452.16	3.93462e-20	1.97743e-21
1453.12	4.20394e-20	1.66153e-21
1454.09	4.53028e-20	2.3109e-21
1455.05	4.95832e-20	4.44175e-21
1456.02	5.33275e-20	6.71984e-21
1456.98	5.64284e-20	8.32094e-21
1457.94	5.93268e-20	7.56719e-21
1458.91	5.97796e-20	5.2846e-21
1459.87	6.10822e-20	2.86697e-21
1460.84	6.25323e-20	2.05054e-21
1461.8	6.29761e-20	1.96674e-21
1462.77	6.20739e-20	1.99279e-21
1463.73	6.30174e-20	2.70824e-21
1464.69	6.52213e-20	3.94699e-21
1465.66	6.66432e-20	2.85213e-21
1466.62	6.57612e-20	2.0614e-21
1467.59	6.30907e-20	1.8469e-21
1468.55	5.96744e-20	1.76925e-21
1469.52	5.82402e-20	2.03284e-21
1470.48	5.77216e-20	2.65945e-21
1471.44	5.92033e-20	4.8024e-21
1472.41	5.90737e-20	7.01145e-21
1473.37	5.46878e-20	5.50994e-21
1474.34	4.99353e-20	3.2131e-21
1475.3	4.84919e-20	3.22808e-21
1476.27	4.4678e-20	3.72614e-21
1477.23	4.07653e-20	2.16787e-21
1478.19	3.79738e-20	1.46752e-21
1479.16	3.50084e-20	1.37285e-21
1480.12	3.25383e-20	1.7041e-21
1481.09	3.01164e-20	2.32642e-21
1482.05	2.61595e-20	1.68568e-21
1483.02	2.32902e-20	1.3404e-21
1483.98	2.09597e-20	1.39272e-21
1484.94	1.90406e-20	1.60606e-21
1485.91	1.75738e-20	2.24964e-21
1486.87	1.68454e-20	3.33292e-21
1487.84	1.44391e-20	3.34688e-21
1488.8	1.40138e-20	4.645e-21
1489.77	1.43474e-20	7.213e-21
1490.73	1.07183e-20	4.64821e-21
1491.69	7.34377e-21	2.16077e-21
1492.66	5.94429e-21	1.31517e-21
1493.62	5.06816e-21	1.29304e-21
1494.59	4.9818e-21	1.79759e-21
1495.55	5.8185e-21	3.34245e-21
1496.52	5.45046e-21	3.67685e-21
1497.48	4.22106e-21	2.85042e-21
1498.44	4.7459e-21	3.59581e-21
1499.41	3.15203e-21	2.77699e-21
1500.37	1.93751e-21	1.95145e-21
1501.34	1.70825e-21	2.20351e-21
1502.3	1.28548e-21	1.83995e-21
1503.27	9.72251e-22	1.59517e-21
1504.23	2.00882e-21	2.70377e-21
1505.19	4.73165e-21	5.74969e-21
1506.16	1.24431e-20	1.24302e-20
1507.12	1.21266e-20	1.35052e-20
1508.09	6.88596e-21	9.29799e-21
1509.05	4.16167e-21	6.00753e-21
1510.01	2.58298e-21	4.09257e-21
1510.98	1.45192e-21	2.82681e-21
1511.94	1.82783e-21	3.17803e-21
1512.91	8.22922e-22	2.39248e-21
1513.87	4.54809e-22	2.03982e-21
1514.84	1.43123e-21	3.41358e-21
1515.8	3.00663e-21	5.15779e-21
1516.76	5.09207e-21	7.78599e-21
1517.73	2.51585e-21	4.61293e-21
1518.69	1.08097e-21	2.89541e-21
1519.66	2.304e-21	3.7643e-21
1520.62	6.32056e-21	7.24743e-21
1521.59	7.61851e-21	8.15673e-21
1522.55	4.69118e-21	6.19797e-21
1523.51	2.22826e-21	3.93382e-21
1524.48	2.25554e-21	4.20095e-21
1525.44	2.81035e-21	4.54401e-21
1526.41	2.06033e-21	3.66742e-21
1527.37	2.67703e-21	3.94143e-21
1528.34	2.04266e-21	3.34021e-21
1529.3	2.41891e-22	1.84896e-21
1530.26	2.3609e-22	1.56491e-21
1531.23	8.4674e-22	2.61718e-21
1532.19	1.69294e-21	3.57127e-21
1533.16	3.45733e-21	5.27204e-21
1534.12	2.72772e-21	4.63978e-21
1535.09	1.25053e-21	3.20572e-21
1536.05	5.29472e-22	2.39836e-21
1537.01	1.12808e-21	2.6491e-21
1537.98	2.9974e-21	4.60458e-21
1538.94	9.49373e-21	1.16213e-20
1539.91	9.37202e-21	1.16639e-20
1540.87	6.22915e-21	8.15326e-21
1541.84	5.34681e-21	7.60763e-21
1542.8	4.5645e-21	6.43556e-21
1543.76	3.85572e-21	5.80638e-21
1544.73	4.58019e-21	6.27561e-21
1545.69	2.47564e-21	3.81615e-21
1546.66	3.95669e-22	1.77504e-21
1547.62	2.77757e-22	1.28536e-21
1548.58	4.77682e-22	1.78889e-21
1549.55	2.50866e-21	3.90463e-21
1550.51	1.80129e-21	2.91756e-21
1551.48	6.33884e-22	1.53832e-21
1552.44	8.87346e-22	1.63281e-21
1553.41	1.91493e-21	2.93789e-21
1554.37	3.51753e-21	5.01251e-21
1555.33	2.27878e-21	3.59331e-21
1556.3	2.29237e-21	3.59557e-21
1557.26	3.77115e-21	5.83313e-21
1558.23	1.65139e-20	1.73852e-20
1559.19	1.77412e-20	1.71664e-20
1560.15	6.39832e-21	6.80173e-21
1561.12	2.15363e-21	3.18131e-21
1562.08	7.76792e-22	1.90686e-21
1563.05	4.50656e-22	1.68305e-21
1564.01	1.13345e-21	2.38219e-21
1564.98	1.56421e-21	2.79719e-21
1565.94	5.66255e-22	1.81728e-21
1566.9	1.20958e-22	1.46206e-21
1567.87	7.35731e-22	1.91917e-21
1568.83	2.97178e-21	4.32132e-21
1569.8	3.17384e-21	4.31721e-21
1570.76	7.27558e-22	1.82546e-21
1571.73	1.39662e-22	1.28331e-21
1572.69	1.54009e-22	1.29431e-21
1573.65	3.91347e-22	1.53354e-21
1574.62	1.53188e-21	2.42971e-21
1575.58	4.35966e-21	4.73572e-21
1576.55	4.52358e-21	5.79062e-21
1577.51	1.92264e-21	3.19095e-21
1578.48	3.15925e-22	1.52727e-21
1579.44	2.16983e-22	1.17665e-21
1580.4	5.40399e-22	1.15808e-21
1581.37	7.39919e-22	1.17309e-21
1582.33	6.036e-22	1.16677e-21
1583.3	5.67137e-22	1.13968e-21
1584.26	8.40476e-22	1.11779e-21
1585.23	9.04238e-22	1.10482e-21
1586.19	9.97069e-22	1.09795e-21
1587.15	1.01899e-21	1.06182e-21
1588.12	8.9872e-22	1.03384e-21
1589.08	4.34751e-22	1.07842e-21
1590.05	6.34782e-22	1.23609e-21
1591.01	9.71673e-22	1.19575e-21
1591.97	1.04507e-21	1.02315e-21
1592.94	8.5575e-22	1.05365e-21
1593.9	2.96431e-22	1.5896e-21
1594.87	2.99008e-22	1.7588e-21
1595.83	6.86313e-22	1.44576e-21
1596.8	8.46126e-22	1.26576e-21
1597.76	1.19421e-21	1.17402e-21
1598.72	1.12255e-21	1.11977e-21
1599.69	1.20016e-21	1.0977e-21
1600.65	9.73838e-22	1.1685e-21
1601.62	9.6162e-22	1.21387e-21
1602.58	5.71206e-22	1.54017e-21
1603.55	5.46288e-22	1.53687e-21
1604.51	9.01491e-22	1.08098e-21
1605.47	7.60066e-22	1.05515e-21
1606.44	1.21144e-22	1.65018e-21
1607.4	1.87228e-22	1.74593e-21
1608.37	5.67331e-22	1.53334e-21
1609.33	1.31252e-22	2.08861e-21
1610.3	5.36798e-22	1.41601e-21
1611.26	9.66812e-22	1.14563e-21
1612.22	9.06905e-22	1.17496e-21
1613.19	9.14085e-22	1.17423e-21
1614.15	6.24738e-22	1.28762e-21
1615.12	2.14856e-22	2.00828e-21
1616.08	2.26587e-21	4.1084e-21
1617.05	2.90292e-21	4.62787e-21
1618.01	7.09607e-22	2.32907e-21
1618.97	4.76738e-22	1.41107e-21
1619.94	5.94225e-22	1.33337e-21
1620.9	4.77228e-22	1.47576e-21
1621.87	3.47618e-22	2.14976e-21
1622.83	2.41822e-21	4.13664e-21
1623.8	1.65775e-21	3.28524e-21
1624.76	2.05431e-22	1.68802e-21
1625.72	4.48218e-22	1.33096e-21
1626.69	4.22785e-22	1.83781e-21
1627.65	1.78291e-21	2.82638e-21
1628.62	2.96569e-22	1.79349e-21
1629.58	5.70876e-22	1.21655e-21
1630.55	6.71861e-22	1.1555e-21
1631.51	4.92318e-22	1.15147e-21
1632.47	2.55399e-22	1.25839e-21
1633.44	5.15652e-22	1.63844e-21
1634.4	2.13409e-21	3.04654e-21
1635.37	5.50827e-21	6.28761e-21
1636.33	4.48785e-21	5.15144e-21
1637.3	3.2596e-21	4.18158e-21
1638.26	1.64893e-21	2.30732e-21
1639.22	1.08167e-21	1.50001e-21
1640.19	8.7709e-22	1.56629e-21
1641.15	7.23616e-22	1.57273e-21
1642.12	1.05465e-21	1.77205e-21
1643.08	1.12774e-21	1.57748e-21
1644.05	1.57896e-21	1.72846e-21
1645.01	3.46717e-21	3.10262e-21
1645.97	7.28066e-21	6.5743e-21
1646.94	8.64001e-21	7.95794e-21
1647.9	6.56034e-21	6.38255e-21
1648.87	3.80979e-21	3.0624e-21
1649.83	3.09707e-21	2.12203e-21
1650.8	4.13583e-21	2.62293e-21
1651.76	6.39628e-21	3.89788e-21
1652.72	1.49738e-20	1.07552e-20
1653.69	1.33331e-20	1.25072e-20
1654.65	6.91468e-21	4.77729e-21
1655.62	4.67938e-21	2.52252e-21
1656.58	4.06423e-21	1.80075e-21
1657.54	3.7188e-21	1.32516e-21
1658.51	3.79569e-21	1.19249e-21
1659.47	4.02779e-21	1.24693e-21
1660.44	4.71005e-21	1.52909e-21
1661.4	5.69141e-21	2.2554e-21
1662.37	7.29797e-21	3.28876e-21
1663.33	6.91533e-21	2.58588e-21
1664.29	5.60657e-21	1.42442e-21
1665.26	5.20631e-21	1.1785e-21
1666.22	5.58825e-21	1.26419e-21
1667.19	6.35409e-21	1.60242e-21
1668.15	8.56295e-21	3.56677e-21
1669.12	1.01225e-20	4.98845e-21
1670.08	9.15568e-21	3.40705e-21
1671.04	9.2664e-21	3.32933e-21
1672.01	8.88384e-21	2.75725e-21
1672.97	8.1468e-21	1.91592e-21
1673.94	8.82657e-21	2.40464e-21
1674.9	1.05494e-20	4.21014e-21
1675.87	1.03776e-20	3.15068e-21
1676.83	9.43756e-21	1.97933e-21
1677.79	9.14948e-21	1.58326e-21
1678.76	9.60921e-21	1.96611e-21
1679.72	1.17139e-20	3.86661e-21
1680.69	1.14016e-20	3.58729e-21
1681.65	1.07647e-20	2.75618e-21
1682.62	1.24088e-20	4.43597e-21
1683.58	1.80911e-20	1.07632e-20
1684.54	1.66263e-20	9.55353e-21
1685.51	1.29418e-20	4.15298e-21
1686.47	1.13623e-20	2.61924e-21
1687.44	1.15869e-20	2.85819e-21
1688.4	1.2096e-20	3.42045e-21
1689.37	1.23073e-20	3.08141e-21
1690.33	1.22101e-20	2.55244e-21
1691.29	1.15879e-20	1.64984e-21
1692.26	1.17133e-20	1.51686e-21
1693.22	1.24168e-20	1.7278e-21
1694.19	1.33304e-20	2.59086e-21
1695.15	1.57354e-20	4.60829e-21
1696.11	1.82626e-20	6.67959e-21
1697.08	1.66897e-20	4.94237e-21
1698.04	1.57098e-20	4.22792e-21
1699.01	1.70017e-20	4.86954e-21
1699.97	2.03451e-20	7.93313e-21
1700.94	1.76528e-20	4.23665e-21
1701.9	1.60941e-20	3.066e-21
1702.86	1.58252e-20	2.61141e-21
1703.83	1.66242e-20	3.17075e-21
1704.79	1.79385e-20	3.80674e-21
1705.76	1.83885e-20	4.26795e-21
1706.72	1.85343e-20	3.99791e-21
1707.68	1.71397e-20	2.12272e-21
1708.65	1.70931e-20	1.63548e-21
1709.61	1.82959e-20	2.30319e-21
1710.58	1.94913e-20	2.19644e-21
1711.54	1.99148e-20	1.67098e-21
1712.51	2.15029e-20	2.13008e-21
1713.47	2.3364e-20	3.43332e-21
1714.43	2.67026e-20	5.45505e-21
1715.4	2.88452e-20	5.33465e-21
1716.36	3.08615e-20	4.90807e-21
1717.33	3.4201e-20	7.05698e-21
1718.29	3.84267e-20	7.09957e-21
1719.26	3.8713e-20	3.48941e-21
1720.22	4.13526e-20	2.17076e-21
1721.18	4.56684e-20	1.94785e-21
1722.15	5.18626e-20	2.19402e-21
1723.11	5.93194e-20	2.64022e-21
1724.08	6.8742e-20	2.36354e-21
1725.04	7.76755e-20	2.06374e-21
1726.01	8.92491e-20	2.17394e-21
1726.97	1.02188e-19	2.50054e-21
1727.93	1.17343e-19	2.86588e-21
1728.9	1.31779e-19	3.7175e-21
1729.86	1.54786e-19	5.73498e-21
1730.83	1.76149e-19	5.22697e-21
1731.79	1.92566e-19	5.30732e-21
1732.76	2.09765e-19	6.84641e-21
1733.72	2.40528e-19	1.0716e-20
1734.68	2.74783e-19	8.72657e-21
1735.65	2.87938e-19	6.66004e-21
1736.61	2.98655e-19	6.76865e-21
1737.58	3.16833e-19	7.60786e-21
1738.54	3.30099e-19	8.05128e-21
1739.51	3.48111e-19	8.78998e-21
1740.47	3.58174e-19	7.95938e-21
1741.43	3.62272e-19	7.59809e-21
1742.4	3.61451e-19	8.77388e-21
1743.36	3.64433e-19	9.95516e-21
1744.33	3.65552e-19	8.70563e-21
1745.29	3.76406e-19	8.53307e-21
1746.26	3.82702e-19	8.94658e-21
1747.22	3.77805e-19	9.35847e-21
1748.18	3.63427e-19	9.85652e-21
1749.15	3.59252e-19	8.90445e-21
1750.11	3.56361e-19	8.14825e-21
1751.08	3.5507e-19	8.95503e-21
1752.04	3.42769e-19	7.70187e-21
1753.01	3.29533e-19	6.62548e-21
1753.97	3.07243e-19	6.1512e-21
1754.93	2.8467e-19	5.79075e-21
1755.9	2.61063e-19	6.29176e-21
1756.86	2.24935e-19	6.09773e-21
1757.83	1.95783e-19	4.72086e-21
1758.79	1.71019e-19	3.7723e-21
1759.76	1.47797e-19	3.42687e-21
1760.72	1.31564e-19	3.99656e-21
1761.68	1.09224e-19	4.40902e-21
1762.65	9.0212e-20	2.7075e-21
1763.61	7.99295e-20	2.06214e-21
1764.58	6.94101e-20	1.72423e-21
1765.54	6.0704e-20	1.59624e-21
1766.51	5.40772e-20	1.77103e-21
1767.47	4.94823e-20	2.6902e-21
1768.43	4.22582e-20	2.64789e-21
1769.4	3.86001e-20	2.04641e-21
1770.36	3.68863e-20	2.84568e-21
1771.33	3.6869e-20	5.07242e-21
1772.29	3.45547e-20	5.90282e-21
1773.25	2.98751e-20	3.24447e-21
1774.22	2.75648e-20	2.10243e-21
1775.18	2.69216e-20	2.26131e-21
1776.15	2.5317e-20	1.79521e-21
1777.11	2.39978e-20	1.28468e-21
1778.08	2.32369e-20	1.4348e-21
1779.04	2.28259e-20	1.88644e-21
1780	2.26674e-20	2.48771e-21
1780.97	2.20997e-20	2.31942e-21
1781.93	2.07769e-20	1.57805e-21
1782.9	2.02985e-20	1.39654e-21
1783.86	2.01414e-20	1.5863e-21
1784.83	2.01414e-20	1.81709e-21
1785.79	1.93714e-20	1.29141e-21
1786.75	1.92243e-20	1.22158e-21
1787.72	1.90396e-20	1.27085e-21
1788.68	1.88525e-20	1.34693e-21
1789.65	1.90301e-20	1.63558e-21
1790.61	2.02381e-20	2.80306e-21
1791.58	2.09038e-20	3.78844e-21
1792.54	2.05767e-20	3.67917e-21
1793.5	1.85492e-20	1.94559e-21
1794.47	1.8104e-20	1.55485e-21
1795.43	1.8581e-20	2.41494e-21
1796.4	1.78782e-20	2.2394e-21
1797.36	1.67321e-20	1.41563e-21
1798.33	1.69363e-20	1.52615e-21
1799.29	1.74161e-20	2.165e-21
1800.25	1.70402e-20	2.06016e-21
1801.22	1.63624e-20	2.03828e-21
1802.18	1.55349e-20	2.04019e-21
1803.15	1.4174e-20	1.30992e-21
1804.11	1.32949e-20	1.16677e-21
1805.08	1.27649e-20	1.1124e-21
1806.04	1.24065e-20	1.07549e-21
1807	1.19827e-20	1.32408e-21
1807.97	1.13031e-20	1.35263e-21
1808.93	1.05041e-20	1.15993e-21
1809.9	1.07119e-20	1.53438e-21
1810.86	1.07818e-20	2.03314e-21
1811.82	9.95994e-21	1.70225e-21
1812.79	8.73736e-21	1.27158e-21
1813.75	7.77497e-21	1.10316e-21
1814.72	7.13067e-21	1.08139e-21
1815.68	6.79326e-21	1.08469e-21
1816.65	6.70784e-21	1.05827e-21
1817.61	6.48081e-21	1.1252e-21
1818.57	5.80867e-21	1.04209e-21
1819.54	5.25246e-21	1.05135e-21
1820.5	4.6352e-21	1.1117e-21
1821.47	4.53709e-21	1.10204e-21
1822.43	4.524e-21	1.15637e-21
1823.39	4.51551e-21	1.2611e-21
1824.36	5.02424e-21	1.70953e-21
1825.32	4.9912e-21	2.04073e-21
1826.29	3.77281e-21	1.24463e-21
1827.25	3.52723e-21	1.13132e-21
1828.22	4.33311e-21	1.66139e-21
1829.18	6.06239e-21	3.78778e-21
1830.14	4.7966e-21	3.2193e-21
1831.11	3.03297e-21	1.50176e-21
1832.07	2.45053e-21	1.07099e-21
1833.04	2.27449e-21	1.02803e-21
1834	1.86009e-21	1.07151e-21
1834.97	1.76454e-21	1.05033e-21
1835.93	2.10235e-21	1.10329e-21
1836.89	2.52226e-21	1.53165e-21
1837.86	1.92945e-21	1.2855e-21
1838.82	1.35827e-21	1.04197e-21
1839.79	1.16186e-21	9.59539e-22
1840.75	1.35053e-21	9.326e-22
1841.72	1.51511e-21	1.14616e-21
1842.68	2.05049e-21	1.74898e-21
1843.64	3.2846e-21	2.98165e-21
1844.61	3.33101e-21	3.17044e-21
1845.57	1.71443e-21	1.69651e-21
1846.54	1.08053e-21	1.21417e-21
1847.5	1.2565e-21	1.48864e-21
1848.47	8.00592e-22	1.25577e-21
1849.43	1.56734e-22	1.01062e-21
1850.39	4.5996e-24	1.01305e-21
1851.36	4.97909e-23	1.02656e-21
1852.32	1.53813e-22	1.01867e-21
1853.29	3.60233e-22	9.7874e-22
1854.25	5.3004e-22	9.66609e-22
1855.22	6.24049e-22	9.39985e-22
1856.18	4.00557e-22	9.51381e-22
1857.14	2.18617e-22	1.02252e-21
1858.11	1.63344e-22	1.11814e-21
1859.07	4.69594e-22	1.0651e-21
1860.04	5.81513e-22	9.85187e-22
1861	4.96389e-22	9.83608e-22
1861.96	5.1399e-22	1.03222e-21
1862.93	6.94897e-22	1.02004e-21
1863.89	6.48082e-22	1.01202e-21
1864.86	4.33175e-22	9.93701e-22
1865.82	2.81429e-22	1.44107e-21
1866.79	8.90569e-22	2.08644e-21
1867.75	1.68454e-21	2.84191e-21
1868.71	1.90301e-21	3.18335e-21
1869.68	9.26918e-22	2.24987e-21
1870.64	5.34263e-23	1.32509e-21
1871.61	4.51473e-22	9.71488e-22
1872.57	7.01955e-22	9.63398e-22
1873.54	7.04958e-22	9.66921e-22
1874.5	6.87991e-22	1.01168e-21
1875.46	7.35114e-22	1.06523e-21
1876.43	8.52654e-22	1.01188e-21
1877.39	9.18406e-22	9.7486e-22
1878.36	1.01497e-21	1.01241e-21
1879.32	8.8802e-22	1.02015e-21
1880.29	1.03821e-21	1.00584e-21
1881.25	1.06737e-21	1.0471e-21
1882.21	7.70118e-22	1.08011e-21
1883.18	6.13177e-22	1.07152e-21
1884.14	5.92261e-22	1.07118e-21
1885.11	8.19559e-22	1.04813e-21
1886.07	1.16849e-21	9.81951e-22
1887.04	1.02239e-21	9.74705e-22
1888	6.32555e-22	9.43706e-22
1888.96	2.1492e-22	1.42566e-21
1889.93	6.59088e-23	1.44412e-21
1890.89	7.14827e-22	9.76996e-22
1891.86	8.77671e-22	9.44169e-22
1892.82	9.94106e-22	9.15538e-22
1893.79	9.15159e-22	9.69514e-22
1894.75	3.00376e-22	1.34488e-21
1895.71	4.61743e-22	1.17347e-21
1896.68	7.48739e-22	9.56956e-22
1897.64	9.03492e-22	9.78519e-22
1898.61	1.03978e-21	9.81835e-22
1899.57	1.02206e-21	9.95058e-22
1900.54	9.40348e-22	1.02514e-21
1901.5	1.02054e-21	1.05527e-21
1902.46	1.28605e-21	1.0279e-21
1903.43	1.14859e-21	9.94417e-22
1904.39	8.29632e-22	1.02148e-21
1905.36	8.71663e-22	9.95862e-22
1906.32	1.01523e-21	9.30342e-22
1907.29	7.8668e-22	1.21138e-21
1908.25	6.3203e-22	1.27198e-21
1909.21	5.97164e-22	1.29879e-21
1910.18	7.70519e-22	1.32447e-21
1911.14	1.21615e-21	1.06192e-21
1912.11	1.20372e-21	1.08302e-21
1913.07	1.28496e-21	1.07031e-21
1914.04	1.28499e-21	1.03708e-21
1915	1.22009e-21	9.81484e-22
1915.96	1.09832e-21	9.70016e-22
1916.93	3.44747e-22	1.28563e-21
1917.89	4.37312e-22	1.94198e-21
1918.86	5.68559e-22	1.21042e-21
1919.82	1.07084e-21	1.04707e-21
1920.79	1.06458e-21	1.05689e-21
1921.75	3.72194e-22	1.5142e-21
1922.71	2.80986e-22	2.30285e-21
1923.68	5.4133e-22	1.2772e-21
1924.64	1.11413e-21	1.01571e-21
1925.61	1.39336e-21	1.05662e-21
1926.57	1.41041e-21	9.91861e-22
1927.53	1.21026e-21	1.01617e-21
1928.5	1.18397e-21	1.04868e-21
1929.46	1.21214e-21	1.03591e-21
1930.43	1.4858e-21	9.94627e-22
1931.39	1.52459e-21	9.40021e-22
1932.36	1.34536e-21	8.94136e-22
1933.32	1.31555e-21	9.26623e-22
1934.28	1.4902e-21	9.8401e-22
1935.25	1.53074e-21	9.82909e-22
1936.21	1.51455e-21	9.10547e-22
1937.18	1.51467e-21	9.176e-22
1938.14	1.55068e-21	9.88617e-22
1939.11	1.52978e-21	9.74048e-22
1940.07	1.5165e-21	9.64037e-22
1941.03	1.00835e-21	1.04124e-21
1942	2.44334e-23	1.95283e-21
1942.96	3.69543e-22	1.63655e-21
1943.93	1.24919e-21	1.00247e-21
1944.89	1.19266e-21	1.00359e-21
1945.86	9.96651e-22	1.14501e-21
1946.82	1.23662e-21	1.102e-21
1947.78	1.57534e-21	1.0304e-21
1948.75	1.63735e-21	9.76284e-22
1949.71	1.81748e-21	9.87567e-22
1950.68	1.93892e-21	1.01081e-21
1951.64	1.87948e-21	1.02254e-21
1952.61	1.84986e-21	1.0624e-21
1953.57	1.88368e-21	1.10465e-21
1954.53	1.66569e-21	1.09663e-21
1955.5	1.68166e-21	1.00437e-21
1956.46	1.76466e-21	9.38095e-22
1957.43	1.7798e-21	9.85837e-22
1958.39	1.81689e-21	9.86209e-22
1959.35	1.90524e-21	1.0253e-21
1960.32	1.79716e-21	1.10109e-21
1961.28	1.55355e-21	1.0607e-21
1962.25	1.616e-21	1.02215e-21
1963.21	2.00625e-21	9.69144e-22
1964.18	1.99582e-21	9.99095e-22
1965.14	1.54029e-21	9.98285e-22
1966.1	1.11925e-21	1.25474e-21
1967.07	9.6598e-22	1.59848e-21
1968.03	1.48612e-21	1.13287e-21
1969	1.92205e-21	1.09485e-21
1969.96	1.81292e-21	1.15246e-21
1970.92	1.64885e-21	1.09801e-21
1971.89	1.64933e-21	1.03977e-21
1972.85	1.86756e-21	1.00045e-21
1973.82	1.85796e-21	1.02544e-21
1974.78	1.96093e-21	1.05627e-21
1975.75	1.88722e-21	1.0043e-21
1976.71	1.85497e-21	1.03162e-21
1977.67	1.80092e-21	1.01241e-21
1978.64	1.7536e-21	9.94821e-22
1979.6	1.771e-21	9.79083e-22
1980.57	1.94341e-21	9.82227e-22
1981.53	1.84722e-21	9.93187e-22
1982.5	1.7127e-21	9.87327e-22
1983.46	1.83656e-21	1.04528e-21
1984.42	1.86741e-21	1.13203e-21
1985.39	1.79792e-21	1.10547e-21
1986.35	1.82146e-21	1.04157e-21
1987.32	1.58459e-21	9.98459e-22
1988.28	1.26497e-21	9.5583e-22
1989.25	1.39628e-21	9.14361e-22
1990.21	1.58075e-21	1.00055e-21
1991.17	1.3263e-21	1.22618e-21
1992.14	9.79982e-22	1.48151e-21
1993.1	1.33489e-21	1.06433e-21
1994.07	1.76457e-21	9.90613e-22
1995.03	1.95397e-21	1.03059e-21
1996	1.92064e-21	1.07772e-21
1996.96	1.91209e-21	1.03707e-21
1997.92	1.81539e-21	1.00928e-21
1998.89	1.62547e-21	9.9112e-22
1999.85	1.64121e-21	9.96455e-22
2000.82	1.54775e-21	9.44559e-22
2001.78	1.78371e-21	9.38179e-22
2002.75	2.07462e-21	9.50248e-22
2003.71	2.15789e-21	9.66929e-22
2004.67	2.03604e-21	1.01234e-21
2005.64	1.99223e-21	1.03751e-21
2006.6	1.86827e-21	9.94091e-22
2007.57	1.70716e-21	9.83757e-22
2008.53	1.64231e-21	1.02242e-21
2009.49	1.84811e-21	1.05076e-21
2010.46	1.71353e-21	1.02321e-21
2011.42	1.77138e-21	9.38709e-22
2012.39	1.92995e-21	8.987e-22
2013.35	1.94553e-21	9.411e-22
2014.32	1.93347e-21	9.80076e-22
2015.28	1.82143e-21	9.82025e-22
2016.24	1.32031e-21	1.05778e-21
2017.21	1.21299e-21	1.13895e-21
2018.17	1.07729e-21	1.05753e-21
2019.14	1.15266e-21	1.05916e-21
2020.1	1.52863e-21	1.01454e-21
2021.07	1.65028e-21	9.74873e-22
2022.03	1.57477e-21	8.97405e-22
2022.99	1.59456e-21	9.4865e-22
2023.96	1.71258e-21	1.01392e-21
2024.92	1.71035e-21	1.03533e-21
2025.89	1.62661e-21	1.08113e-21
2026.85	1.52817e-21	1.004e-21
2027.82	1.45867e-21	9.69068e-22
2028.78	1.47412e-21	9.44919e-22
2029.74	1.44524e-21	9.76165e-22
2030.71	1.43302e-21	9.86168e-22
2031.67	1.44612e-21	9.88877e-22
2032.64	1.46088e-21	1.03876e-21
2033.6	1.41429e-21	1.00752e-21
2034.57	1.46974e-21	9.79311e-22
2035.53	1.50449e-21	9.21529e-22
2036.49	1.4577e-21	9.46347e-22
2037.46	1.42167e-21	1.02508e-21
2038.42	1.34471e-21	1.06182e-21
2039.39	1.23947e-21	9.76585e-22
2040.35	1.05907e-21	9.64152e-22
2041.32	1.03302e-21	9.6987e-22
2042.28	1.38301e-21	9.63899e-22
2043.24	1.31828e-21	9.82168e-22
2044.21	1.10114e-21	1.03294e-21
2045.17	1.10183e-21	1.0122e-21
2046.14	1.23852e-21	9.52047e-22
2047.1	1.24568e-21	9.16521e-22
2048.07	1.19321e-21	9.2284e-22
2049.03	1.245e-21	9.63557e-22
2049.99	1.36627e-21	1.03271e-21
2050.96	1.3778e-21	1.00685e-21
2051.92	1.33156e-21	9.22036e-22
2052.89	1.27666e-21	9.85471e-22
2053.85	1.19125e-21	1.04282e-21
2054.82	1.05725e-21	1.05348e-21
2055.78	1.18343e-21	1.03775e-21
2056.74	1.34488e-21	9.73447e-22
2057.71	1.33903e-21	9.42397e-22
2058.67	1.15056e-21	9.30868e-22
2059.64	1.07366e-21	9.3391e-22
2060.6	1.02597e-21	9.95183e-22
2061.57	1.22353e-21	9.90962e-22
2062.53	1.6051e-21	9.98713e-22
2063.49	1.62127e-21	1.02216e-21
2064.46	1.35435e-21	1.00842e-21
2065.42	1.4288e-21	9.7278e-22
2066.39	1.62268e-21	9.776e-22
2067.35	1.76112e-21	1.03735e-21
2068.32	1.80488e-21	1.05008e-21
2069.28	1.67635e-21	1.00481e-21
2070.24	1.65358e-21	1.02806e-21
2071.21	1.61905e-21	9.86099e-22
2072.17	1.52272e-21	9.87404e-22
2073.14	1.60221e-21	1.0101e-21
2074.1	1.86429e-21	1.01069e-21
2075.06	1.8758e-21	9.88961e-22
2076.03	1.63633e-21	9.44508e-22
2076.99	1.77177e-21	9.9733e-22
2077.96	1.8195e-21	9.83696e-22
2078.92	1.83737e-21	1.00835e-21
2079.89	1.93865e-21	1.05182e-21
2080.85	2.04084e-21	1.06647e-21
2081.81	1.83246e-21	1.01817e-21
2082.78	1.72648e-21	9.57671e-22
2083.74	1.72842e-21	9.9035e-22
2084.71	1.61e-21	1.03686e-21
2085.67	1.54297e-21	1.04198e-21
2086.64	1.61283e-21	9.7801e-22
2087.6	1.51916e-21	9.33767e-22
2088.56	1.33196e-21	9.40011e-22
2089.53	1.35661e-21	9.51236e-22
2090.49	1.52491e-21	9.80972e-22
2091.46	1.50627e-21	9.70942e-22
2092.42	1.60341e-21	9.25184e-22
2093.39	1.66417e-21	9.17037e-22
2094.35	1.62226e-21	8.87621e-22
2095.31	1.73804e-21	8.47102e-22
2096.28	1.8275e-21	9.37707e-22
2097.24	1.77083e-21	1.01137e-21
2098.21	1.62942e-21	9.74345e-22
2099.17	1.68445e-21	9.97561e-22
2100.14	1.87924e-21	1.03941e-21
2101.1	1.83396e-21	1.05202e-21
2102.06	1.73198e-21	9.78829e-22
2103.03	1.71658e-21	9.93053e-22
2103.99	1.86475e-21	1.0286e-21
2104.96	1.84821e-21	9.72782e-22
2105.92	1.80957e-21	9.29597e-22
2106.89	1.72837e-21	9.3949e-22
2107.85	1.75603e-21	9.56782e-22
2108.81	1.73695e-21	1.0328e-21
2109.78	1.68068e-21	1.09461e-21
2110.74	1.47882e-21	1.01551e-21
2111.71	1.73047e-21	9.65755e-22
2112.67	1.99329e-21	9.53258e-22
2113.63	1.71618e-21	9.57493e-22
2114.6	1.59969e-21	9.91725e-22
2115.56	1.63591e-21	9.78194e-22
2116.53	1.59258e-21	9.40188e-22
2117.49	1.72857e-21	8.79997e-22
2118.46	1.71255e-21	8.99062e-22
2119.42	1.58882e-21	9.29413e-22
2120.38	1.45995e-21	1.00443e-21
2121.35	1.67724e-21	9.95099e-22
2122.31	1.72333e-21	9.85942e-22
2123.28	1.63742e-21	9.33133e-22
2124.24	1.88669e-21	9.1801e-22
2125.2	1.91915e-21	9.69932e-22
2126.17	1.83119e-21	9.61838e-22
2127.13	1.81594e-21	9.24384e-22
2128.1	1.83929e-21	9.19773e-22
2129.06	1.82906e-21	9.19148e-22
2130.03	1.72428e-21	9.45093e-22
2130.99	1.6463e-21	9.93179e-22
2131.95	1.49688e-21	9.83275e-22
2132.92	1.69062e-21	9.52799e-22
2133.88	1.72912e-21	9.65948e-22
2134.85	1.47741e-21	9.84903e-22
2135.81	1.45763e-21	9.64624e-22
2136.78	1.51422e-21	8.9972e-22
2137.74	1.48582e-21	9.00356e-22
2138.7	1.53321e-21	9.10917e-22
2139.67	1.69686e-21	9.54186e-22
2140.63	1.79722e-21	9.93319e-22
2141.6	1.79849e-21	9.7352e-22
2142.56	1.7964e-21	9.50561e-22
2143.53	1.61059e-21	9.7462e-22
2144.49	1.61193e-21	1.0037e-21
2145.45	1.76209e-21	9.81582e-22
2146.42	1.80615e-21	9.53012e-22
2147.38	1.76214e-21	9.75116e-22
2148.35	1.76358e-21	1.00567e-21
2149.31	1.81244e-21	9.9014e-22
2150.28	1.79989e-21	9.87405e-22
2151.24	1.68984e-21	9.55147e-22
2152.2	1.64524e-21	9.4026e-22
2153.17	1.48571e-21	9.32798e-22
2154.13	1.64226e-21	9.82736e-22
2155.1	1.69253e-21	9.94036e-22
2156.06	1.61992e-21	9.8325e-22
2157.03	1.55965e-21	9.61176e-22
2157.99	1.55729e-21	9.14374e-22
2158.95	1.64348e-21	9.23492e-22
2159.92	1.69808e-21	8.28361e-22
2160.88	1.68084e-21	8.51709e-22
2161.85	1.6873e-21	9.25678e-22
2162.81	1.54023e-21	9.50321e-22
2163.78	1.49001e-21	9.83246e-22
2164.74	1.57358e-21	9.63055e-22
2165.7	1.67857e-21	9.26922e-22
2166.67	1.63846e-21	9.22908e-22
2167.63	1.56655e-21	9.19184e-22
2168.6	1.78887e-21	9.46751e-22
2169.56	1.90798e-21	9.86533e-22
2170.53	1.74409e-21	9.3744e-22
2171.49	1.84471e-21	9.80487e-22
2172.45	1.8175e-21	9.74381e-22
2173.42	1.71657e-21	9.0316e-22
2174.38	1.64442e-21	8.71682e-22
2175.35	1.65364e-21	8.84172e-22
2176.31	1.63924e-21	9.42894e-22
2177.28	1.67119e-21	9.6121e-22
2178.24	1.74769e-21	9.54949e-22
2179.2	1.74182e-21	9.21763e-22
2180.17	1.77186e-21	8.90711e-22
2181.13	1.79209e-21	8.81549e-22
2182.1	1.79997e-21	9.20685e-22
2183.06	1.87094e-21	9.15265e-22
2184.03	1.97768e-21	8.84875e-22
2184.99	1.98421e-21	9.23425e-22
2185.95	1.82124e-21	9.88064e-22
2186.92	1.88114e-21	9.9963e-22
2187.88	2.08787e-21	9.61476e-22
2188.85	2.03613e-21	9.92774e-22
2189.81	1.7593e-21	1.04814e-21
2190.77	1.5719e-21	1.09539e-21
2191.74	1.78923e-21	1.01493e-21
2192.7	2.07844e-21	1.00315e-21
2193.67	2.1176e-21	9.71573e-22
2194.63	2.02613e-21	9.75007e-22
2195.59	1.75927e-21	9.95677e-22
2196.56	1.76156e-21	9.87091e-22
2197.52	2.02993e-21	9.7737e-22
2198.49	2.21771e-21	9.36849e-22
2199.45	2.13994e-21	9.01252e-22
2200.42	2.02845e-21	9.51305e-22
2201.38	1.96729e-21	1.01379e-21
2202.34	1.90584e-21	1.04085e-21
2203.31	1.98562e-21	1.00466e-21
2204.27	2.01994e-21	9.44502e-22
2205.24	1.76966e-21	9.48266e-22
2206.2	1.482e-21	9.6982e-22
2207.17	1.55076e-21	9.48905e-22
2208.13	1.78239e-21	9.21517e-22
2209.09	1.90706e-21	9.29541e-22
2210.06	1.65855e-21	8.79126e-22
2211.02	1.4547e-21	8.68699e-22
2211.99	1.60267e-21	9.22126e-22
2212.95	1.65149e-21	9.15779e-22
2213.92	1.56225e-21	9.58695e-22
2214.88	1.60255e-21	1.0241e-21
2215.84	1.69444e-21	1.03174e-21
2216.81	1.70622e-21	1.02122e-21
2217.77	1.6629e-21	9.89243e-22
2218.74	1.57918e-21	9.41478e-22
2219.7	1.54131e-21	9.0082e-22
2220.67	1.53489e-21	8.90737e-22
2221.63	1.5934e-21	9.65475e-22
2222.59	1.74424e-21	9.87029e-22
2223.56	1.69344e-21	9.66802e-22
2224.52	1.76109e-21	9.72284e-22
2225.49	1.68502e-21	9.87986e-22
2226.45	1.58737e-21	1.00045e-21
2227.42	1.41429e-21	9.06888e-22
2228.38	1.34345e-21	9.02268e-22
2229.34	1.39166e-21	9.47407e-22
2230.31	1.37238e-21	9.1447e-22
2231.27	1.34466e-21	9.2615e-22
2232.24	1.23034e-21	9.21612e-22
2233.2	1.37758e-21	9.00196e-22
2234.17	1.76492e-21	9.43258e-22
2235.13	1.80447e-21	9.59096e-22
2236.09	1.6046e-21	9.4463e-22
2237.06	1.65813e-21	9.27293e-22
2238.02	1.65493e-21	8.92922e-22
2238.99	1.47313e-21	9.07247e-22
2239.95	1.40518e-21	9.21969e-22
2240.91	1.46304e-21	9.60832e-22
2241.88	1.43982e-21	9.51259e-22
2242.84	1.412e-21	9.51887e-22
2243.81	1.52919e-21	1.00145e-21
2244.77	1.62228e-21	9.96455e-22
2245.74	1.64681e-21	9.68835e-22
2246.7	1.62852e-21	9.36738e-22
2247.66	1.44869e-21	9.74307e-22
2248.63	1.20757e-21	9.89292e-22
2249.59	1.20348e-21	9.35613e-22
2250.56	1.28043e-21	9.11755e-22
2251.52	1.34318e-21	9.57338e-22
2252.49	1.50323e-21	9.92343e-22
2253.45	1.51136e-21	1.00602e-21
2254.41	1.53726e-21	9.66172e-22
2255.38	1.47586e-21	9.5011e-22
2256.34	1.2666e-21	9.74404e-22
2257.31	1.25356e-21	1.00174e-21
2258.27	1.36548e-21	1.02952e-21
2259.24	1.33986e-21	1.06497e-21
2260.2	1.41938e-21	1.11305e-21
2261.16	1.37092e-21	1.17411e-21
2262.13	1.46523e-21	1.16614e-21
2263.09	1.55657e-21	1.15517e-21
2264.06	1.38942e-21	1.0977e-21
2265.02	1.27784e-21	1.06483e-21
2265.99	1.26277e-21	1.06295e-21
2266.95	1.31805e-21	1.05932e-21
2267.91	1.36783e-21	1.1075e-21
2268.88	1.20013e-21	1.21494e-21
2269.84	1.21722e-21	1.27227e-21
2270.81	1.09876e-21	1.20901e-21
2271.77	9.60346e-22	1.17427e-21
2272.74	9.10611e-22	1.20166e-21
2273.7	1.01361e-21	1.11718e-21
2274.66	1.15257e-21	1.01363e-21
2275.63	1.37922e-21	1.02361e-21
2276.59	1.29172e-21	9.56823e-22
2277.56	1.03833e-21	9.1752e-22
2278.52	1.10372e-21	9.60867e-22
2279.49	1.25514e-21	9.75254e-22
2280.45	1.37043e-21	1.05576e-21
2281.41	1.49407e-21	1.06387e-21
2282.38	1.49013e-21	9.90145e-22
2283.34	1.4978e-21	9.41385e-22
2284.31	1.43613e-21	9.66152e-22
2285.27	1.2703e-21	1.02325e-21
2286.24	8.88184e-22	1.03185e-21
2287.2	7.87016e-22	1.12202e-21
2288.16	7.40835e-22	1.22394e-21
2289.13	7.68127e-22	1.28689e-21
2290.09	9.17893e-22	1.25632e-21
2291.06	8.93156e-22	1.47726e-21
2292.02	8.2123e-22	1.57516e-21
2292.99	5.77845e-22	1.76933e-21
2293.95	2.94678e-22	2.02462e-21
2294.91	4.27378e-22	2.08245e-21
2295.88	3.54559e-22	2.29423e-21
2296.84	1.92419e-22	2.24118e-21
2297.81	3.54211e-22	2.66553e-21
2298.77	3.91457e-22	2.54333e-21
2299.73	4.17598e-22	2.77812e-21
2300.7	3.53699e-22	2.9319e-21
2301.66	5.41069e-22	2.80645e-21
2302.63	1.20281e-21	3.12538e-21
2303.59	9.9501e-22	3.041e-21
2304.56	1.19072e-21	3.7621e-21
2305.52	1.15678e-21	3.54873e-21
2306.48	1.94068e-21	4.41686e-21
2307.45	1.79487e-21	4.4618e-21
2308.41	2.62527e-21	5.24169e-21
2309.38	3.23581e-21	5.24468e-21
2310.34	3.39204e-21	6.10893e-21
2311.3	3.20408e-21	6.6889e-21
2312.27	3.32039e-21	6.50734e-21
2313.23	3.84057e-21	7.1299e-21
2314.2	3.35447e-21	6.99976e-21
2315.16	3.77904e-21	7.67989e-21
2316.13	3.87439e-21	7.56591e-21
2317.09	4.70143e-21	8.60956e-21
2318.05	4.9249e-21	8.68126e-21
2319.02	6.27195e-21	1.0053e-20
2319.98	6.44545e-21	1.02449e-20
2320.95	7.36954e-21	1.15193e-20
2321.91	7.19635e-21	1.16688e-20
2322.88	7.52824e-21	1.27133e-20
2323.84	7.56993e-21	1.24503e-20
2324.8	7.98471e-21	1.32666e-20
2325.77	7.79425e-21	1.32571e-20
2326.73	9.23536e-21	1.42792e-20
2327.7	9.06517e-21	1.43194e-20
2328.66	9.50836e-21	1.52431e-20
2329.63	9.5393e-21	1.54285e-20
2330.59	1.01827e-20	1.58044e-20
2331.55	1.01555e-20	1.57542e-20
2332.52	1.00086e-20	1.60665e-20
2333.48	9.57068e-21	1.56371e-20
2334.45	9.81265e-21	1.562e-20
2335.41	1.01272e-20	1.59903e-20
2336.38	1.09848e-20	1.7389e-20
2337.34	1.06034e-20	1.69981e-20
2338.3	1.039e-20	1.69829e-20
2339.27	1.08425e-20	1.71814e-20
2340.23	1.1519e-20	1.74169e-20
2341.2	1.1429e-20	1.71792e-20
2342.16	1.15084e-20	1.76628e-20
2343.13	1.12126e-20	1.74484e-20
2344.09	1.1189e-20	1.71958e-20
2345.05	1.05781e-20	1.66796e-20
2346.02	9.54097e-21	1.50186e-20
2346.98	8.17435e-21	1.27673e-20
2347.95	6.27925e-21	9.8999e-21
2348.91	6.1418e-21	9.18589e-21
2349.88	8.401e-21	1.15096e-20
2350.84	9.65004e-21	1.35134e-20
2351.8	1.07636e-20	1.56681e-20
2352.77	1.18396e-20	1.66557e-20
2353.73	1.31912e-20	1.83789e-20
2354.7	1.38486e-20	1.95103e-20
2355.66	1.53042e-20	2.12079e-20
2356.62	1.58327e-20	2.25003e-20
2357.59	1.64585e-20	2.43277e-20
2358.55	1.67093e-20	2.38065e-20
2359.52	1.7718e-20	2.41035e-20
2360.48	1.6298e-20	2.35103e-20
2361.45	1.4897e-20	2.38561e-20
2362.41	1.55735e-20	2.36346e-20
2363.38	1.72595e-20	2.31725e-20
2364.34	1.63102e-20	2.21779e-20
2365.3	1.47796e-20	2.19762e-20
2366.27	1.32809e-20	2.03555e-20
2367.23	1.35123e-20	1.94991e-20
2368.2	1.26142e-20	1.83555e-20
2369.16	1.16643e-20	1.72233e-20
2370.12	1.04442e-20	1.59023e-20
2371.09	9.39327e-21	1.45265e-20
2372.05	8.81359e-21	1.29631e-20
2373.02	7.99366e-21	1.18964e-20
2373.98	6.91494e-21	1.042e-20
2374.95	6.03872e-21	9.3747e-21
2375.91	4.70553e-21	8.53768e-21
2376.88	3.89867e-21	7.25354e-21
2377.84	3.63383e-21	5.96324e-21
2378.8	3.02321e-21	5.04012e-21
2379.77	2.02832e-21	4.20107e-21
2380.73	1.2912e-21	3.37889e-21
2381.7	7.70259e-22	2.6772e-21
2382.66	3.47752e-22	1.98704e-21
2383.62	5.02058e-23	1.51935e-21
2384.59	2.75737e-22	1.19729e-21
2385.55	4.67854e-22	1.02054e-21
2386.52	6.67305e-22	1.06859e-21
2387.48	7.94323e-22	1.09321e-21
2388.45	8.41316e-22	1.10738e-21
2389.41	1.14905e-21	1.01242e-21
2390.37	1.0699e-21	9.30267e-22
2391.34	9.06761e-22	1.02176e-21
2392.3	1.26054e-21	1.05196e-21
2393.27	1.48198e-21	1.05418e-21
2394.23	1.28026e-21	1.10378e-21
2395.2	1.29043e-21	1.02447e-21
2396.16	1.41662e-21	9.12879e-22
2397.12	1.70723e-21	8.83143e-22
2398.09	1.39973e-21	8.88181e-22
2399.05	1.14837e-21	9.36679e-22
2400.02	1.13671e-21	9.15145e-22
2400.98	1.1075e-21	9.24756e-22
2401.95	1.17903e-21	9.88511e-22
2402.91	1.36887e-21	1.01816e-21
2403.87	1.51076e-21	9.3476e-22
2404.84	1.36455e-21	8.98603e-22
2405.8	1.24954e-21	8.86398e-22
2406.77	1.18126e-21	9.62753e-22
2407.73	1.12977e-21	9.83908e-22
2408.7	1.3361e-21	1.02483e-21
2409.66	1.41303e-21	1.03721e-21
2410.62	1.04596e-21	9.79439e-22
2411.59	9.18548e-22	9.79684e-22
2412.55	1.3449e-21	1.03402e-21
2413.52	1.30911e-21	9.64254e-22
2414.48	1.09805e-21	8.53698e-22
2415.44	9.60438e-22	8.67256e-22
2416.41	1.11161e-21	9.42577e-22
2417.37	1.24952e-21	1.00623e-21
2418.34	1.26802e-21	9.82778e-22
2419.3	1.24868e-21	9.73268e-22
2420.27	1.36439e-21	1.11608e-21
2421.23	1.41339e-21	1.07802e-21
2422.19	1.41729e-21	9.24828e-22
2423.16	1.45766e-21	8.652e-22
2424.12	1.40177e-21	9.01656e-22
2425.09	1.37865e-21	9.47845e-22
2426.05	1.31438e-21	9.88997e-22
2427.01	1.18102e-21	1.00311e-21
2427.98	1.38018e-21	1.00572e-21
2428.94	1.61713e-21	9.68142e-22
2429.91	1.54683e-21	9.38174e-22
2430.87	1.42276e-21	9.65155e-22
2431.84	1.47371e-21	1.05323e-21
2432.8	1.49619e-21	1.00399e-21
2433.76	1.45769e-21	9.91641e-22
2434.73	1.39754e-21	9.45291e-22
2435.69	1.45105e-21	9.04269e-22
2436.66	1.52944e-21	9.62859e-22
2437.62	1.44224e-21	9.84876e-22
2438.59	1.42029e-21	9.60372e-22
2439.55	1.25963e-21	1.0169e-21
2440.51	1.17756e-21	1.00601e-21
2441.48	1.23385e-21	8.99452e-22
2442.44	1.19055e-21	9.23213e-22
2443.41	1.37502e-21	9.76105e-22
2444.37	1.60888e-21	9.26349e-22
2445.34	1.60298e-21	9.78278e-22
2446.3	1.53862e-21	1.04777e-21
2447.26	1.42154e-21	9.80823e-22
2448.23	1.44964e-21	9.79088e-22
2449.19	1.46999e-21	1.02637e-21
2450.16	1.41289e-21	9.91952e-22
2451.12	1.29232e-21	9.66788e-22
2452.09	1.34462e-21	9.92283e-22
2453.05	1.43282e-21	1.07376e-21
2454.01	1.51312e-21	1.15238e-21
2454.98	1.55277e-21	1.10975e-21
2455.94	1.48991e-21	1.0191e-21
2456.91	1.36865e-21	9.64414e-22
2457.87	1.3003e-21	9.68334e-22
2458.84	1.42759e-21	9.75043e-22
2459.8	1.47217e-21	9.80061e-22
2460.76	1.3857e-21	1.03112e-21
2461.73	1.31226e-21	1.06582e-21
2462.69	1.45508e-21	1.03523e-21
2463.66	1.58683e-21	1.02395e-21
2464.62	1.48774e-21	9.5429e-22
2465.59	1.40715e-21	8.82918e-22
2466.55	1.51655e-21	8.99335e-22
2467.51	1.51219e-21	9.36391e-22
2468.48	1.4989e-21	9.58236e-22
2469.44	1.5626e-21	1.04634e-21
2470.41	1.5886e-21	1.0452e-21
2471.37	1.428e-21	9.91843e-22
2472.34	1.3916e-21	9.89745e-22
2473.3	1.53467e-21	9.79982e-22
2474.26	1.62836e-21	1.04585e-21
2475.23	1.6346e-21	1.00724e-21
2476.19	1.67214e-21	9.59378e-22
2477.16	1.65774e-21	9.56229e-22
2478.12	1.63677e-21	9.77116e-22
2479.09	1.52059e-21	9.58421e-22
2480.05	1.55597e-21	9.73184e-22
2481.01	1.59063e-21	1.01572e-21
2481.98	1.4421e-21	1.08205e-21
2482.94	1.5465e-21	1.02916e-21
2483.91	1.72821e-21	1.00069e-21
2484.87	1.54647e-21	9.62019e-22
2485.83	1.3732e-21	8.9133e-22
2486.8	1.43985e-21	8.29881e-22
2487.76	1.58572e-21	9.02944e-22
2488.73	1.59225e-21	1.00505e-21
2489.69	1.59904e-21	1.0495e-21
2490.66	1.68458e-21	9.97764e-22
2491.62	1.7933e-21	9.60349e-22
2492.58	1.56452e-21	8.79226e-22
2493.55	1.60014e-21	9.0917e-22
2494.51	1.57551e-21	1.03262e-21
2495.48	1.34172e-21	1.05957e-21
2496.44	1.2903e-21	9.72567e-22
2497.41	1.44664e-21	9.28745e-22
2498.37	1.73991e-21	1.01021e-21
2499.33	1.88034e-21	1.00395e-21
2500.3	1.75197e-21	9.07688e-22
2501.26	1.58358e-21	9.42871e-22
2502.23	1.32988e-21	9.18678e-22
2503.19	1.3208e-21	9.17443e-22
2504.16	1.3999e-21	9.52375e-22
2505.12	1.25826e-21	9.65574e-22
2506.08	1.00878e-21	9.68278e-22
2507.05	1.11293e-21	9.41317e-22
2508.01	1.40076e-21	9.43529e-22
2508.98	1.45382e-21	9.54686e-22
2509.94	1.40427e-21	9.35974e-22
2510.91	1.57575e-21	9.78665e-22
2511.87	1.39788e-21	9.75581e-22
2512.83	1.26415e-21	9.31572e-22
2513.8	1.46724e-21	9.30261e-22
2514.76	1.75799e-21	9.5238e-22
2515.73	1.70584e-21	9.47786e-22
2516.69	1.61118e-21	9.54294e-22
2517.66	1.63343e-21	8.9965e-22
2518.62	1.36769e-21	9.15668e-22
2519.58	1.31264e-21	9.73491e-22
2520.55	1.29677e-21	8.67343e-22
2521.51	1.11851e-21	8.24848e-22
2522.48	1.3506e-21	9.40581e-22
2523.44	1.50322e-21	9.39793e-22
2524.41	1.29738e-21	9.55499e-22
2525.37	1.2411e-21	1.00168e-21
2526.33	1.34591e-21	9.6663e-22
2527.3	1.11786e-21	9.40817e-22
2528.26	9.9398e-22	9.90295e-22
2529.23	1.06227e-21	9.84423e-22
2530.19	1.15837e-21	1.02743e-21
2531.15	1.21782e-21	1.10039e-21
2532.12	1.16566e-21	1.01453e-21
2533.08	8.26564e-22	8.87816e-22
2534.05	9.39166e-22	9.23608e-22
2535.01	1.19135e-21	9.77718e-22
2535.98	1.43833e-21	9.50955e-22
2536.94	1.45791e-21	9.36246e-22
2537.9	1.28732e-21	9.58254e-22
2538.87	1.30104e-21	9.24719e-22
2539.83	1.38538e-21	8.7302e-22
2540.8	1.28137e-21	8.78498e-22
2541.76	1.2128e-21	8.69635e-22
2542.72	1.04172e-21	8.85412e-22
2543.69	1.00685e-21	9.48156e-22
2544.65	1.22267e-21	9.70819e-22
2545.62	1.30042e-21	1.01748e-21
2546.58	1.15523e-21	1.0281e-21
2547.55	1.21032e-21	1.03068e-21
2548.51	1.33517e-21	9.74212e-22
2549.47	1.24454e-21	9.19433e-22
2550.44	9.67244e-22	9.15708e-22
2551.4	1.01182e-21	9.28728e-22
2552.37	1.20229e-21	9.16421e-22
2553.33	1.1006e-21	9.79479e-22
2554.3	1.01467e-21	9.85933e-22
2555.26	9.18809e-22	9.96048e-22
2556.22	1.04018e-21	9.15681e-22
2557.19	1.22104e-21	8.43182e-22
2558.15	1.33234e-21	9.64339e-22
2559.12	1.21013e-21	1.1386e-21
2560.08	1.01928e-21	1.21862e-21
2561.05	9.88667e-22	1.21533e-21
2562.01	9.57763e-22	1.0417e-21
2562.97	1.03702e-21	9.0204e-22
2563.94	1.14045e-21	8.83024e-22
2564.9	9.81357e-22	9.01391e-22
2565.87	8.13423e-22	9.23562e-22
2566.83	8.52183e-22	9.46564e-22
2567.8	9.18724e-22	8.40744e-22
2568.76	7.47766e-22	8.59602e-22
2569.72	6.14416e-22	8.82779e-22
2570.69	7.81784e-22	9.14406e-22
2571.65	1.00539e-21	9.07652e-22
2572.62	1.19795e-21	8.98908e-22
2573.58	1.1427e-21	9.21678e-22
2574.55	1.14372e-21	9.11351e-22
2575.51	9.52875e-22	8.72978e-22
[truncated: 1,477 more rows]
